1                    **Bmal1 integrates mitochondrial metabolism and macrophage activation**

2

3 Ryan K. Alexander<sup>1</sup>, Yae-Huei Liou<sup>1</sup>, Nelson H. Knudsen<sup>1</sup>, Kyle A. Starost<sup>1</sup>, Chuanrui Xu<sup>1,2</sup>,

4 Alexander L. Hyde<sup>1</sup>, Sihao Liu<sup>1,3</sup>, David Jacobi<sup>1,4</sup>, Nan-Shih Liao<sup>5</sup> and Chih-Hao Lee<sup>1,\*</sup>

5

6 <sup>1</sup>Department of Molecular Metabolism, Division of Biological Sciences, Harvard T.H. Chan

7 School of Public Health, 665 Huntington Ave, Boston, MA 02115, USA

8 <sup>2</sup>School of Pharmacy, Tongji Medical College, Huazhong University of Science and

9 Technology, Wuhan, PR China

10 <sup>3</sup>Current address: Ionis Pharmaceuticals, 2855 Gazelle Ct, Carlsbad, CA 92110, USA

11 <sup>4</sup>Current address: l'institut du thorax, INSERM, CNRS, UNIV Nantes & CHU Nantes, Nantes,

12 France

13 <sup>5</sup>Institute of Molecular Biology, Academia Sinica, 128 Academia Rd. Section 2, Taipei, Taiwan,

14 ROC

15

16 \*Correspondence should be addressed: C.-H.L. e-mail: [cleeh@hsph.harvard.edu](mailto:cleeh@hsph.harvard.edu) Department of

17 Molecular Metabolism, Harvard T.H. Chan School of Public Health, 665 Huntington Ave,

18 Bldg1, Rm 409, Boston, MA 02115, USA. Phone: +1(617) 432-5778

19

20

21 **ABSTRACT**

22 Metabolic pathways and inflammatory processes are under circadian regulation. While rhythmic  
23 immune cell recruitment is known to impact infection outcomes, whether the circadian clock  
24 modulates immunometabolism remains unclear. We find the molecular clock *Bmal1* is induced by  
25 inflammatory stimulants, including Ifn- $\gamma$ /lipopolysaccharide (M1) and tumor conditioned medium,  
26 to maintain mitochondrial metabolism under these metabolically stressed conditions in mouse  
27 macrophages. Upon M1 stimulation, myeloid-specific *Bmal1* knockout (M-BKO) renders  
28 macrophages unable to sustain mitochondrial function, enhancing succinate dehydrogenase  
29 (SDH)-mediated mitochondrial ROS production and Hif-1 $\alpha$ -dependent metabolic reprogramming  
30 and inflammatory damage. In tumor-associated macrophages, the aberrant Hif-1 $\alpha$  activation and  
31 metabolic dysregulation by M-BKO contribute to an immunosuppressive tumor  
32 microenvironment. Consequently, M-BKO increases melanoma tumor burden, while  
33 administering an SDH inhibitor dimethyl malonate suppresses tumor growth. Therefore, *Bmal1*  
34 functions as a metabolic checkpoint integrating macrophage mitochondrial metabolism, redox  
35 homeostasis and effector functions. This *Bmal1*-Hif-1 $\alpha$  regulatory loop may provide therapeutic  
36 opportunities for inflammatory diseases and immunotherapy.

37

## 38 INTRODUCTION

39 Inflammation and host defense are energetically costly processes that must balance the use of host  
40 resources with an efficient containment of infection or injury. This is underpinned by dynamic  
41 regulation of energy metabolism in immune cells in response to extrinsic signals, including  
42 cytokines, pathogen- and damage-associated molecular patterns and tumor-derived metabolites  
43 (Andrejeva & Rathmell, 2017; Buck, Sowell, Kaech, & Pearce, 2017; Ganeshan & Chawla, 2014;  
44 Hotamisligil, 2017; O'Neill, Kishton, & Rathmell, 2016). For instance, activation of macrophages  
45 by bacterial products, such as lipopolysaccharide (LPS) from gram-negative bacteria, shifts core  
46 metabolic function toward increased reliance on aerobic glycolysis with concomitant inhibition of  
47 mitochondrial respiration (Fukuzumi, Shinomiya, Shimizu, Ohishi, & Utsumi, 1996; Rodriguez-  
48 Prados et al., 2010; Tannahill et al., 2013). The depressed mitochondrial function appears to be by  
49 design, as this process serves multiple purposes. It leads to the so-called 'broken TCA cycle' due  
50 in part to shunting of citric acid to lipid synthesis (Andrejeva & Rathmell, 2017). Itaconate, also  
51 derived from citrate/aconitate, can modulate macrophage immune response through different  
52 mechanisms (Lampropoulou et al., 2016; Mills et al., 2018). By contrast, succinate accumulates  
53 through anaplerotic reactions, notably glutaminolysis (Tannahill et al., 2013). Succinate oxidation  
54 to fumarate mediated by succinate dehydrogenase (SDH)/ETC complex II activity is a primary  
55 source of mitochondrial reactive oxygen species (mROS) in inflammatory macrophages that are  
56 involved in bactericidal activity (Mills et al., 2016; West et al., 2011). Succinate/SDH is believed  
57 to trigger mROS production through accumulation of reduced coenzyme Q leading to reverse  
58 electron transfer to ETC complex I (Chouchani et al., 2014; Robb et al., 2018). These findings  
59 demonstrate a well-orchestrated metabolic signaling event at the expense of reduced fuel economy  
60 and compromised mitochondrial function in macrophages.

61           In addition to its bacterial-killing effect, mROS stabilize hypoxia-inducible factor (Hif) -  
62 1 $\alpha$  through inhibition of prolyl-hydroxylase enzymes that target Hif-1 $\alpha$  for ubiquitination by the  
63 von Hippel–Lindau (Vhl) E3 ubiquitin ligase and subsequent proteasomal degradation (Bell et al.,  
64 2007; Jaakkola et al., 2001). Hif-1 $\alpha$  is a master transcriptional regulator of genes involved in  
65 glycolysis and anabolic metabolism, thereby supplementing the energetic needs of the broken TCA  
66 cycle (Cramer et al., 2003; Masson & Ratcliffe, 2014; Semenza, Roth, Fang, & Wang, 1994). Hif-  
67 1 $\alpha$  is also required for the expression of the urea cycle enzyme arginase-1 (*Arg1*). Arg1 and nitric  
68 oxide synthase 2 were initially designated as markers for M2 and M1 macrophages, as these two  
69 enzymes convert amino acid arginine to citrulline and nitric oxide, respectively. However, M1  
70 activation also up-regulates *Arg1* through Hif-1 $\alpha$ . Similarly, in the nutrient-deprived tumor  
71 microenvironment, tumor-derived lactate has been proposed to increase Hif-1 $\alpha$  activity in tumor-  
72 associated macrophages (TAMs) to up-regulate *Arg1* (Colegio et al., 2014). Aberrant expression  
73 of Arg1 in TAMs results in local arginine depletion that inhibits antitumor immunity mediated by  
74 cytotoxic T cells and natural killer (NK) cells (Doedens et al., 2010; Steggerda et al., 2017).  
75 Accordingly, myeloid-specific deletion of *Hif1a* or *Arg1* suppresses tumor growth in mice  
76 (Colegio et al., 2014; Doedens et al., 2010). These observations suggest that the distinction  
77 between M1/M2 activation may not be as clear *in vivo* and highlight the importance of energetic  
78 regulation in immune cell activation.

79           The circadian rhythm has been implicated in many biological/pathological processes,  
80 including immune response and tumor progression (Hardin & Panda, 2013; Nguyen et al., 2013;  
81 Papagiannakopoulos et al., 2016). The molecular clock includes the master regulator Bmal1 (or  
82 Aryl hydrocarbon receptor nuclear translocator-like protein 1, Arntl) and its transcriptional partner  
83 Clock as well as the negative regulatory loop, including Nr1d1, Nr1d2, period (Per1/2/3) and

84 cryptochrome (Cry1/2) proteins, and the positive regulator loop, including Rora/β/γ (Hardin &  
85 Panda, 2013). Several nuclear receptors, such as peroxisome proliferator-activated receptors,  
86 Pparα, Pparδ/β and Pparγ, are downstream of Bmal1/Clock and control the expression of clock  
87 output genes (Canaple et al., 2006; S. Liu et al., 2013; Yang et al., 2006). The circadian clock is  
88 both robust and flexible. It has been demonstrated that time-restricted feeding in mice can  
89 synchronize the peripheral clock separable from the central clock (Damiola et al., 2000),  
90 suggesting that a primary function of circadian rhythm is to maximize the metabolic efficiency. In  
91 concert, we and others have shown that hepatic Bmal1 regulates rhythmic mitochondrial capacity  
92 in anticipation of nutrient availability (Jacobi et al., 2015; Peek et al., 2013). Prior studies have  
93 implicated the circadian oscillator in regulating macrophage inflammatory function. Notably,  
94 myeloid-specific *Bmal1* deletion disrupts diurnal monocyte trafficking and increases systemic  
95 inflammation and mortality in sepsis mouse models (Nguyen et al., 2013). Whether and how the  
96 circadian clock controls immune cell metabolism to modulate their effector functions remains  
97 unclear.

98         In the present study, we describe a cell-autonomous role for Bmal1 in macrophage  
99 energetic regulation. Bmal1 is induced following macrophage inflammatory stimulation. Its loss-  
100 of-function exacerbates mitochondrial dysfunction, energetic stress and Hif-1α-dependent  
101 metabolic reprogramming. By using the B16-F10 melanoma model, our results demonstrate that  
102 the regulatory axis between Bmal1 and Hif-1α dictates macrophage energy investment that is  
103 relevant for discrete activation/polarization states, including M1 and tumor-associated  
104 macrophages.

105

106

## 107 RESULTS

### 108 The circadian clock is a transcriptional module induced by M1 activation

109 To assess transcriptional regulators that modulate macrophage energetics and inflammatory  
110 function, we performed RNA sequencing (RNA-seq) comparing interferon- $\gamma$  (Ifn- $\gamma$ ) primed bone  
111 marrow-derived macrophages without or with LPS stimulation (10 ng/mL for 8 hours, referred to  
112 as M1 activation). Gene ontology analysis using the DAVID platform was performed to identify  
113 clusters of transcription factors that were up- or down-regulated in inflammatory macrophages,  
114 which were used to generate a protein-protein interaction map using STRING (Figure 1  
115 supplemental table 1 and Figure 1 supplemental figure 1A). Several activators of mitochondrial  
116 function/biogenesis were repressed, including *c-Myc* (Li et al., 2005), *Pparg*, Pparg co-activator 1  
117 beta (*Pgc1b*), and mitochondrial transcription factor B1 (*Tfb1m*) and *Tfb2m*. On the other hand,  
118 the canonical inflammatory (e.g., *Nfkb1/2*, *Rela/b*, *Hif1a*, interferon regulatory factor 7 (*Irf7*) and  
119 *Irf8*) and stress response (e.g., *Atf3*, *Atf6b* and *Nfe2l2*) transcriptional modules were up-regulated.  
120 Interestingly, clusters of circadian oscillator components (e.g., *Per1*, *Cry1*, *Nr1d1*, *Nr1d2* and  
121 *Rora*) as well as nuclear receptors downstream of the molecular clock (e.g., *Ppard* and its  
122 heterodimeric partner *Rxra*) (S. Liu et al., 2013) were also induced.

123 We examined the expression of *Bmal1*, the non-redundant master regulator of circadian  
124 rhythm, and found that M1 activation (Figure 1A) or LPS treatment without Ifn- $\gamma$  priming (Figure  
125 1B) induced its mRNA and protein levels, peaking at 12 hours after the stimulation. Because LPS  
126 was directly added to the cell culture without changing the medium, the induction of *Bmal1* was  
127 not due to serum shock (Tamaru et al., 2003). In fact, a one-hour LPS treatment in culture medium  
128 with 2% serum was sufficient to reset *Bmal1* expression (Figure 1C), in a manner resembling  
129 serum shock (requiring a much higher serum concentration). Similar results were observed in

130 mouse embryonic fibroblasts (MEFs), suggesting that the inflammatory regulation of *Bmal1* was  
131 not macrophage-specific (Figure 1 supplemental figure 1B).

132 Myeloid-specific *Bmal1* knockout (M-BKO, *Bmal1<sup>lflf</sup>* crossed to *Lyz2-Cre*; *Bmal1<sup>lflf</sup>* was  
133 used as the wild-type control, WT) mice were generated to determine the role of circadian clock  
134 in macrophage function. M-BKO did not affect M1 induction of canonical inflammatory  
135 regulators, such as *Nfkb1*, *Stat3*, *Hif1a* and *c-Myc* (Figure 1D). The expression of genes  
136 downstream of *Bmal1*, including *Nr1d2*, *Cry1* and *Ppard*, was dysregulated, and there was a  
137 further reduction of *Pparg* expression by M1 activation in M-BKO macrophages compared to WT  
138 cells (Figure 1D). By contrast, M2 activation by Il-4 did not regulate *Bmal1* mRNA levels, and Il-  
139 4-induced expression of *Arg1* and *Mgl2* was not altered by M-BKO (Figure 1 supplemental figure  
140 1C). These results suggest that the circadian clock may function as a downstream effector of M1  
141 stimulation in a cell-autonomous manner.

142

### 143 ***Bmal1* promotes mitochondrial metabolism in inflammatory macrophages**

144 Because *Ppar $\delta$* /*Ppar $\gamma$*  are known regulators of mitochondrial function and energy substrate  
145 utilization in macrophages (Dai et al., 2017; Kang et al., 2008; Lee et al., 2006; Odegaard et al.,  
146 2007), we sought to determine the role of *Bmal1* in macrophage bioenergetic control. In WT  
147 macrophages, M1 activation caused a progressive decrease in mitochondrial content, which was  
148 more pronounced in M-BKO macrophages (Figure 2A). The reduced mitochondrial content was  
149 likely due to mitophagy, as demonstrated by the increased level of the mitophagy receptor *Bnip3*  
150 (Figure 2B). Measurement of ETC complex activity in isolated mitochondria indicated that M-  
151 BKO also caused a significant reduction in the activities of complex II and III, given an equal  
152 amount of mitochondrial protein, 6 hours after M1 stimulation (Figure 2C). Seahorse extracellular

153 flux analysis showed that LPS injection increased the extracellular acidification rate (ECAR,  
154 indicative of lactic acid secretion) and decreased the oxygen consumption rate (OCR) of WT  
155 macrophages, as expected from aerobic glycolysis (Figure 2D). The ECAR and OCR were further  
156 enhanced and suppressed, respectively, in M-BKO macrophages. Similar results were obtained in  
157 thioglycollate-elicited peritoneal macrophages isolated from WT and M-BKO mice (Figure 2  
158 supplemental figure 1A). By contrast, stable overexpression of *Bmall* (Bmall-OE) in RAW264.7  
159 macrophages resulted in a higher OCR and lower ECAR after LPS stimulation, compared to  
160 control cells (Figure 2 supplemental figure 1B-C). To directly examine aerobic glycolysis, glucose  
161 was injected during the extracellular flux assay with or without co-injection with LPS. There was  
162 no difference in the basal glycolytic rate between WT and M-BKO macrophages (Figure 2E). LPS  
163 increased ECAR in both genotypes and to a greater extent in M-BKO macrophages. The induced  
164 ECAR could be blocked by injection of 2-deoxyglucose (2-DG), confirming the acidification was  
165 caused by aerobic glycolysis. Furthermore, an increase in the glycolytic rate was observed in  
166 splenic macrophages from M-BKO mice isolated 6 hours after *i.p.* injection of LPS, which was  
167 accompanied by lowered circulating glucose levels, indicative of increased glucose consumption  
168 by inflammatory myeloid cells in M-BKO mice, compared to WT animals (Figure 2 supplemental  
169 figure 1D-E).

170 To further assess the metabolic state, metabolomics analyses were employed to compare  
171 cellular metabolite levels of WT and M-BKO macrophages 0, 6 and 12 hours after M1 activation  
172 (Figure 3A-B and Figure 3 supplemental table 1). As has been reported (Tannahill et al., 2013),  
173 M1 activation caused accumulation of glycolytic intermediates (glucose-6-phosphate, fructose-6-  
174 phosphate and lactic acid) and depletion of TCA metabolites (e.g. citrate) but accumulation of  
175 succinate. Glycolytic metabolites and succinate were significantly higher in M-BKO macrophages



176 compared to WT cells. M-BKO cells also showed accumulation of several amino acids and  
177 intermediates of the urea cycle (which detoxifies ammonia released from amino acid deamination)  
178 (Figure 3A and Figure 3 supplemental table 1). Consistent with the increased glycolytic  
179 metabolites, M1-stimulated glucose uptake and lactate production were higher in M-BKO  
180 macrophages (Figure 3C-D). These results suggest *Bmal1* loss-of-function leads to metabolic  
181 dysregulation in M1-stimulated macrophages.

182

### 183 **The *Bmal1*-Hif-1 $\alpha$ crosstalk regulates macrophage energy metabolism**

184 As mentioned earlier, Hif-1 $\alpha$  is a primary regulator of glucose metabolism in inflammatory  
185 macrophages. The enhanced aerobic glycolysis in M-BKO macrophages prompted us to examine  
186 whether Hif-1 $\alpha$  activity was aberrantly elevated. Western blot analyses revealed that M1 activation  
187 led to a several-fold induction of Hif-1 $\alpha$  protein levels in M-BKO macrophages compared to WT  
188 cells (Figure 4A), while *Bmal1*-OE RAW264.7 macrophages showed reduced Hif-1 $\alpha$  protein  
189 (Figure 4 supplemental figure 1A). The expression of Hif-1 $\alpha$  targets, such as lactate  
190 dehydrogenase A (*Ldha*), *Arg1* and *Illb*, was enhanced by M-BKO and blocked by myeloid *Hif1a*  
191 knockout (M-HKO, Figure 4B). Hif-1 $\alpha$  gene expression was not different between WT and M-  
192 BKO cells (Figure 1D). mROS derived from increased succinate oxidation has previously been  
193 demonstrated to stabilize Hif-1 $\alpha$  protein in inflammatory macrophages (Mills et al., 2016).  
194 Metabolite analyses showed accumulation of succinate in M-BKO macrophages, suggesting that  
195 elevated mROS may be the cause of the increased Hif-1 $\alpha$  protein. In fact, levels of mROS were  
196 higher in isolated mitochondria from M-BKO macrophages at 1 and 4 hours of M1 activation  
197 compared to WT macrophages (Figure 4C). Addition of succinate increased mROS production in  
198 mitochondria from both WT and M-BKO macrophages. An additional two-fold induction of

199 mROS was detected in mitochondria from 4-hour M1 stimulated M-BKO, but not WT  
200 macrophages. Hif-1 $\alpha$  protein accumulation could be normalized between genotypes by co-  
201 treatment with the antioxidant N-acetylcysteine (N-AC) or the competitive complex II inhibitor  
202 dimethylmalonate (DMM) that blocks mROS production (Figure 4D). Furthermore, M1-  
203 stimulated glucose uptake, lactate release and aerobic glycolysis were attenuated in myeloid-  
204 specific *Bmal1* and *Hif1a* double knockout macrophages (M-BHdKO, Figure 4 supplemental  
205 figure 1B-D), indicating the increased glucose utilization in M-BKO was Hif-1 $\alpha$ -dependent.

206 A previous study suggests that *Bmal1* deletion impairs the expression of *Nfe2l2* (which  
207 encodes Nrf2) and its downstream antioxidant genes thereby increasing oxidative stress (Early et  
208 al., 2018). However, we found that expression *Nfe2l2* and Nrf2-induced oxidative stress responsive  
209 genes, such as NAD(P)H quinone dehydrogenase 1 (*Nqo1*, Figure 4 supplemental figure 1E), were  
210 up-regulated in M-BKO macrophages upon M1 stimulation, suggesting that increased mROS  
211 associated with M-BKO was the cause rather than consequence of dysregulated Nrf2 signaling.  
212 Collectively, these data indicate that *Bmal1* and Hif-1 $\alpha$  regulate opposing metabolic programs and  
213 that *Bmal1*-mediated mitochondrial metabolism serves to fine-tune Hif-1 $\alpha$  activity by modulating  
214 oxidative stress.

215

### 216 ***Bmal1* loss-of-function induces metabolic reprogramming toward amino acid catabolism**

217 To fully characterize metabolic programs that were impacted by *Bmal1* loss-of-function,  
218 we compared RNA-seq data from control and M1-activated WT and M-BKO macrophages. These  
219 analyses revealed that the majority of M1-induced or suppressed genes were regulated in a similar  
220 manner between WT and M-BKO macrophages, suggesting that *Bmal1* gene deletion did not cause  
221 a general defect in inflammatory activation (Figure 5 supplemental figure 1A and Figure 5

222 supplemental table 1). Gene ontology analyses of the top enriched categories of M1-upregulated  
223 genes shared by both genotypes included regulation of apoptosis, response to stress and cytokine  
224 production. Among the top categories of suppressed genes were the cell cycle, DNA repair and  
225 carbohydrate metabolism. The latter showed that most TCA cycle enzymes were down-regulated  
226 by M1 activation (Figure 5A).

227 Direct comparison between M1-stimulated WT and M-BKO macrophages revealed that  
228 genes more highly expressed in M1-activated M-BKO macrophages were enriched for protein  
229 catabolism and amino acid transport (Figure 5 supplemental figure 1B and Figure 5 supplemental  
230 table 1). These included genes encoding plasma membrane amino acid transporters (e.g., *Slc7a2*,  
231 *Slc7a8*, *Slc7a11*, *Slc38a2* and *Slc38a7*) as well as ubiquitin-activating, -conjugating and -ligating  
232 enzymes that target proteins for proteasomal degradation (e.g., ubiquitin-like modifier-activating  
233 enzyme 6 (*Uba6*), ubiquitin conjugating enzymes *Ube2q2* and *Ube2e3*, ring finger proteins *Rnf12*,  
234 *Rnf56*, *Rnf128*, and *Rnf171*, cullin 3 (*Cul3*) and *Cul5*, and ubiquitin protein ligase e3a (*Ube3a*))  
235 (Figure 5A-B). The expression of enzymes involved in the breakdown of branched chain amino  
236 acids was also higher in M1-activated M-BKO cells, including branched chain keto acid  
237 dehydrogenase E1 subunit beta (*Bckdhb*) and methylmalonate semialdehyde dehydrogenase  
238 (*Mmsdh*). These results are consistent with increased amino acid catabolism observed in metabolite  
239 assays (Figure 3A). Interestingly, certain genes described above, notably *Slc7a8*, appeared to be  
240 counter-regulated by Hif-1 $\alpha$ , as their induction by M1 stimulation was blunted in M-HKO  
241 macrophages (Figure 5 supplemental figure 1C).

242 *Slc7a8*, also called L-type amino acid transporter 2 (Lat2), transports neutral amino acids  
243 that could be converted to succinate and potentially contribute to Hif-1 $\alpha$  protein stabilization. In  
244 line with increased amino acid metabolism, extracellular flux analysis showed that M-BKO

245 macrophages showed enhanced glutamine utilization compared to WT cells, which was blocked  
246 by 2-amino-bicyclo-(2,2,1)-heptane-2-carboxylate (BCH), an L-type amino acid transporter  
247 inhibitor (Christensen, Handlogten, Lam, Tager, & Zand, 1969; Segawa et al., 1999) (Figure 5  
248 supplemental figure 1D). BCH decreased and normalized levels of Hif-1 $\alpha$  protein between WT  
249 and M-BKO macrophages (Figure 5C). In addition, treatment with either BCH or DMM  
250 suppressed the expression of *Il1b*, *Slc7a8* and *Slc7a11* induced by M1 stimulation (Figure 5D).  
251 The combination of BCH and DMM did not exert a greater effect over that of DMM alone. Thus,  
252 amino acid metabolism is up-regulated in response to dysregulated energy metabolism in M-BKO  
253 macrophages, which contributes to increased oxidative stress and Hif-1 $\alpha$  activation.

254

### 255 **Macrophage *Bmal1* gene deletion promotes an immune-suppressive tumor-associated** 256 **macrophage phenotype and enhances tumor growth**

257 It has been suggested that myeloid-specific *Bmal1* deletion disrupts diurnal monocyte  
258 trafficking thereby increasing sepsis-induced systemic inflammation and mortality (Nguyen et al.,  
259 2013). Our results suggest that the cell-autonomous function of *Bmal1* on macrophage metabolism  
260 and Hif-1 $\alpha$  activation may contribute to the reported phenotype. Hif-1 $\alpha$  regulates the polarization  
261 of M1 and tumor-associated macrophages, both of which are under energetically challenged  
262 conditions. We sought to determine whether the *Bmal1*-Hif-1 $\alpha$  crosstalk plays a role in modulating  
263 TAM activation through a mechanism similar to that in M1 stimulation. Treatment of macrophages  
264 with conditioned medium from primary B16-F10 tumors (T-CM) increased the expression of  
265 *Bmal1* mRNA as well as protein (Figure 6A). M-BKO macrophages showed enhanced mROS  
266 production and Hif-1 $\alpha$  protein induced by T-CM, compared to WT macrophages (Figure 6B-C).  
267 Tracking with Hif-1 $\alpha$  stabilization, aerobic glycolysis was up-regulated by T-CM pretreatment in

268 WT and to a greater extent in M-BKO macrophages (Figure 6D). T-CM elicited an energetic stress  
269 gene expression signature resembling M1 stimulation, including up-regulated amino acid  
270 metabolism (*Arg1*, *Slc7a8* and *Bckdhb*) and oxidative stress (*Slc7a11* and *Nqo1*) pathways in WT  
271 macrophages that were further induced by M-BKO (Figure 6E). Subsequently, we employed a  
272 mouse model of melanoma through subcutaneous injection of B16-F10 melanoma cells to assess  
273 the impact of myeloid *Bmal1* deletion on tumor growth. Tumor volume was increased in both male  
274 and female M-BKO mice compared to WT controls (Figure 6F). Furthermore, the expression of  
275 *Arg1*, *Slc7a8* and *Slc7a11* was up-regulated in F4/80<sup>+</sup> cells isolated from tumors but not spleens  
276 of M-BKO mice compared to WT animals (Figure 6G). Of note, the mRNA levels of *Arg1*, *Slc7a8*  
277 and *Slc7a11* were substantially higher in tumor versus splenic F4/80<sup>+</sup> cells, consistent with the  
278 results observed in T-CM treated macrophages.

279 To confirm that macrophage *Bmal1* modulates tumor growth cell-autonomously and assess  
280 the effect of TAMs on anti-tumor immune response within the same host environment, we co-  
281 injected B16-F10 cells with either WT or M-BKO macrophages into the right or left flanks,  
282 respectively, of WT mice. Tumor growth rate was substantially higher when co-injected with M-  
283 BKO macrophages compared to WT cell co-injection (Figure 7A). In concert, co-injection with  
284 M-BKO macrophages led to a reduction in the CD8<sup>+</sup> T cell population among tumor-infiltrating  
285 CD45<sup>+</sup> leukocytes as well as functionally primed CD8<sup>+</sup> T and NK cells that expressed *Ifn-γ* protein  
286 following stimulation with phorbol myristate acetate and ionomycin *ex vivo* (Figure 7B). Similar  
287 results were obtained when the co-injections were performed in M-BKO mice (Figure 7  
288 supplemental figure 1A-B).

289 We next sought to address the importance of oxidative stress in TAM activation. Similar  
290 to M1 macrophages, DMM blocked Hif-1 $\alpha$  protein accumulation and attenuated *Arg1* up-

291 regulation in T-CM-treated macrophages (Figure 7 supplemental figure 1C-D). Administering  
292 DMM (~150 mg/kg body) at the time of macrophage-tumor cell co-inoculation effectively  
293 suppressed melanoma tumor growth and normalized the difference in tumor promoting effects  
294 between WT and M-BKO macrophage (Figure 7C). These results reveal a unifying mechanism  
295 through which Bmal1 controls macrophage effector functions through bioenergetic regulation and  
296 suggest that targeting oxidative stress may provide a means to modulate the anti-tumor activity of  
297 TAMs.  
298  
299

## 300 **DISCUSSION**

301           It has been reported that sepsis exerts a long-lasting effect on circadian rhythm alteration  
302 in mice (Marpegán, Bekinschtein, Costas, & Golombek, 2005; O'Callaghan, Anderson, Moynagh,  
303 & Coogan, 2012). In the current study, we show that inflammatory stimulants, including Ifn- $\gamma$ /LPS  
304 and tumor-derived factors, control the expression of the circadian master regulator *Bmal1* in the  
305 macrophages. Our data further demonstrate that *Bmal1* is an integral part of the metabolic  
306 regulatory network and modulates macrophage activation, in part, through crosstalk with Hif-1 $\alpha$ .  
307 The *Bmal1*-Hif-1 $\alpha$  regulatory loop regulates the balance between oxidative and glycolytic  
308 metabolism in energetically stressed macrophages with distinct effector functions. *Bmal1* loss-of-  
309 function in M1-activated macrophages causes mitochondrial dysfunction, thereby potentiating  
310 mROS production and Hif-1 $\alpha$  protein stabilization, which likely contributes to the increased  
311 sepsis-induced inflammatory damage reported for M-BKO mice (Nguyen et al., 2013). Within the  
312 tumor microenvironment, macrophage *Bmal1* gene deletion leads to compromised anti-tumor  
313 immunity and accelerated tumor growth in a mouse melanoma model. Therefore, the *Bmal1*-Hif-  
314 1 $\alpha$  nexus serves as a metabolic switch that may be targeted to control macrophage effector  
315 functions.

316           Much attention has been focused on how inflammatory stimuli disrupt mitochondrial  
317 metabolism as a means to generate signaling molecules, including TCA metabolites and mROS.  
318 The analysis of transcriptional modules involved in macrophage inflammatory response reveals a  
319 coordinated effort in the control of mitochondrial activity. The expression of several regulators of  
320 mitochondrial biogenesis (e.g., *Pparg*) is down-regulated rapidly after M1 stimulation and  
321 rebounds between 8-12 hours, when *Bmal1* and *Ppard* expression are induced (Figure 1). Several  
322 lines of evidence indicate that *Bmal1* plays a key role in restoring mitochondrial function and in

323 modulating Hif-1 $\alpha$ -mediated inflammatory response. The expression of transcription factors  
324 known to control mitochondrial bioenergetics discussed above (i.e., Ppar $\gamma$  and Ppar $\delta$ ) is down-  
325 regulated by M-BKO. Macrophages deficient in *Bmall* are unable to sustain mitochondrial  
326 function upon M1 stimulation, while *Bmall* gain-of-function in RAW 246.7 macrophages  
327 promotes oxidative metabolism. The metabolic dysregulation in M-BKO macrophages further  
328 promotes Hif-1 $\alpha$ -controlled glycolytic metabolism and other alternative sources for fuel  
329 utilization, such as amino acid catabolism. Although *Bmall* is best known for its role in circadian  
330 regulation and has been shown to control rhythmic monocyte recruitment and gene expression  
331 (Nguyen et al., 2013), our data suggest that LPS or M1 stimulation could “reset the clock” by  
332 inducing/resynchronizing the expression of *Bmall*. In this context, *Bmall* controls the timing of  
333 glycolytic to oxidative metabolism transition that dictates the extent of Hif-1 $\alpha$  activation and the  
334 associated inflammatory response.

335 Both *Bmall* and Hif-1 $\alpha$  belong to the basic helix-loop-helix (bHLH) transcription factor  
336 family and have similar domain structures. However, they appear to regulate opposing metabolic  
337 programs, with Hif-1 $\alpha$  serving as a master regulator of aerobic glycolysis and *Bmall* as a positive  
338 regulator of oxidative metabolism (Figure 7 supplemental figure 1E). The crosstalk between these  
339 two bHLH transcription factors is in part mediated by succinate and SDH/complex II-facilitated  
340 mROS production. Succinate is one of the entry points for anaplerosis that attempts to replenish  
341 TCA cycle metabolites depleted by disruption of mitochondrial oxidative metabolism. Increased  
342 protein/amino acid catabolism provides a source of anaplerotic reactions. Succinate accumulation  
343 and the subsequent oxidation to fumarate, however, generate mROS, which stabilizes Hif-1 $\alpha$   
344 protein to drive aerobic glycolysis. Our data suggest that amino acid metabolism appears to be  
345 down- and up-regulated by *Bmall* and Hif-1 $\alpha$ , respectively, as demonstrated by the regulation of



346 *Arg1* and *Slc7a8* gene expression. Hif-1 $\alpha$  has also been shown to regulate Bnip3-mediated  
347 mitophagy that reduces mitochondrial oxidative capacity (Zhang et al., 2008). Therefore, Bmal1-  
348 controlled mitochondrial metabolism provides a break to this feedforward cycle to limit  
349 inflammatory damage. In line with this, previous work has demonstrated that myeloid *Bmal1*  
350 knockout mice have reduced survival rate upon *L. monocytogenes* infection (Nguyen et al., 2013).  
351 These observations indicate a tightly regulated metabolic program in the macrophage to execute  
352 effector functions and place Bmal1-regulated mitochondrial metabolism at the center of an orderly  
353 and balanced immune response.

354         Despite being characterized as M2-like, TAMs share several common features with M1-  
355 activated macrophages. Both of them function under nutrient-restricted conditions and Hif-1 $\alpha$  is  
356 required for their activation. Previous studies implicate a glycolytic preference of TAMs in breast,  
357 thyroid, and pancreatic cancer (Arts et al., 2016; D. Liu et al., 2017; Penny et al., 2016). Our data  
358 confirm that T-CM treatment enhances glycolysis in the macrophage accompanied by increased  
359 Hif-1 $\alpha$  protein (Figure 6C-D). *Arg1*, originally defined as an M2 marker, is a *bona fide* target of  
360 Hif-1 $\alpha$  up-regulated in TAMs and M1 macrophages. *Arg1* is involved in the urea cycle that  
361 detoxifies ammonia, and its induction supports amino acid catabolism. M-BKO macrophages show  
362 increased mROS, glycolytic metabolism and Hif-1 $\alpha$  stabilization and up-regulation of *Arg1* and  
363 *Slc7a8* upon treatment with T-CM. Dysregulated amino acid metabolism has been shown to impact  
364 immune cell activation. Arginine depletion impairs lymphocyte function, as arginine is required  
365 for effector T cell and NK cell proliferation and maintenance (Geiger et al., 2016; Lamas et al.,  
366 2012; Steggerda et al., 2017). *Slc7a8* transports neutral amino acids, including branched chain  
367 amino acids that are essential for lymphocyte activation and cytotoxic function (Sinclair et al.,  
368 2013; Tsukishiro, Shimizu, Higuchi, & Watanabe, 2000). As such, the increased amino acid

369 utilization by M-BKO macrophages may contribute to the observed reduction in populations of  
370 Ifn- $\gamma$ -producing CD8<sup>+</sup> T and NK cells in tumor-infiltrating CD45<sup>+</sup> leukocytes (Figure 7B and  
371 Figure 7 supplementary figure 1B). The fact that amino acid/protein metabolism and oxidative  
372 stress genes (*Arg1*, *Slc7a8* and *Slc7a11*) are up-regulated in TAMs, compared to splenic  
373 macrophages (Figure 6G) supports the notion that the energetic stress is also a key determinant of  
374 TAM polarization. As a proof-of-principle approach, we show that DMM treatment blocks T-CM  
375 induced Hif-1 $\alpha$  protein stabilization *in vitro* and suppresses tumor growth *in vivo*. Thus, while M1  
376 macrophages opt for an inefficient way to produce ATP, TAMs are limited in energy allocations.  
377 Both of these processes result in an energetically challenged state in which Bmal1-Hif-1 $\alpha$  crosstalk  
378 controls the metabolic adaptation that shapes macrophage polarization. Future studies  
379 investigating mechanisms to harness this energetic stress will likely identify means to effectively  
380 modulate immune cell functions.

381

382

383 **MATERIALS and METHODS**

384 **Reagents.** Lipopolysaccharide, or LPS, from *Escherichia coli* strain K-235 (L2143) was from  
385 Sigma-Aldrich. Recombinant murine Ifn- $\gamma$  (315-05) and Il-4 (214-14) were from Peprotech. The  
386 ETC complex II inhibitor dimethyl malonate (136441) and the L-type amino acid transport  
387 inhibitor 2-amino-2-norbornanecarboxylic acid, or BCH, (A7902) were from Sigma-Aldrich.

388

389 **Animals.** All animal studies were approved by the Harvard Medical Area Standing Committee on  
390 Animal Research. Animals were housed in a pathogen-free barrier facility at the Harvard T.H.  
391 Chan School of Public Health. *Bmal1<sup>fl/fl</sup>* (stock # 007668), *Hif1a<sup>fl/fl</sup>* (stock # 007561), and *Lyz2-*  
392 *Cre* (stock # 004781) mice in the C57BL/6J background were obtained from Jackson lab and were  
393 originally contributed by Drs. Charles Weitz, Dmitriy Lukashev, and Irmgard Foerster,  
394 respectively. Floxed mice were crossed with *Lyz2-Cre* mice to generate myeloid-specific *Bmal1*  
395 and *Hif1a* knockout mice. Myeloid-specific *Bmal1* knockout mice were crossed with *Hif1a<sup>fl/fl</sup>*  
396 mice, and the resulting heterozygotes were crossed to generate myeloid-specific *Bmal1* and *Hif1a*  
397 double knockout mice. The genotypes were validated by both DNA genotyping and mRNA  
398 expression. Gender- and age-matched mice between 8-24 weeks of age were used for experiments.  
399 Similar results were obtained from male and female mice.

400

401 **Bone marrow-derived macrophage (BMDM) differentiation and cell culture.** Macrophages  
402 were differentiated from primary mouse bone marrow from the femur and tibia using  
403 differentiation medium containing 30% L929-conditioned medium, 10% FBS, and pen-strep  
404 solution in low-glucose DMEM in 15 cm petri dishes. Media were changed every three days, and  
405 cells were lifted, counted, and plated in final format in tissue culture plates on days 7-8 of

406 differentiation. For experiments, primary macrophages were maintained in low glucose DMEM  
407 containing 10% FBS and pen-strep. For M1 activation, macrophages were primed with 10 ng/mL  
408 Ifn- $\gamma$  for 10-12 hours and subsequently stimulated with 10 ng/mL of *E. coli* LPS at the start of each  
409 experiment. Macrophages with Ifn- $\gamma$  priming but without LPS were used as the control for M1  
410 activation.

411

412 **Peritoneal and splenic macrophage isolation and culture.** For peritoneal macrophage isolation,  
413 mice aged 2-4 months were *i.p.* injected with 3 mL of 3% thioglycollate (Sigma-Aldrich, T9032).  
414 After 3 days, mice were euthanized, and peritoneal cells were recovered by lavage. For isolation  
415 of splenic macrophages, mice were euthanized and spleens were dissected and mashed in growth  
416 medium (high glucose DMEM with 10% FBS) and passed through a 70  $\mu$ m strainer. Cells were  
417 pelleted and resuspended in red blood cell lysis buffer. Monocytes and lymphocytes were  
418 recovered using the Ficoll-Paque Plus density gradient medium (GE Healthcare Life Sciences,  
419 17144002) according to the manufacturer's instructions, and suspension cells (lymphocytes) were  
420 washed away prior to experiments.

421

422 **LPS synchronization of Bmal1 expression.** To synchronize Bmal1 gene and protein expression  
423 with LPS (or LPS shock), BMDMs or MEFs were given fresh culture medium with 2% FBS and  
424 100 ng/mL LPS for 1 hour and then given fresh medium with 2% FBS without LPS. Bmal1  
425 expression was tracked following LPS removal. For M1 or LPS induction of Bmal1 expression,  
426 cells were primed with or without 10 ng/mL Ifn- $\gamma$  for 10-12 hours in DMEM, 10% FBS and  
427 subsequently stimulated with 10 ng/mL of LPS without changing the medium (time zero).

428

429 **Cell lines.** Mouse embryonic fibroblasts (MEFs) were isolated from WT C57/BL6J mouse  
430 embryos and immortalized using the 3T3 protocol as previously described(Xu, 2005). For  
431 experiments, immortalized MEFs were maintained in growth medium containing high glucose  
432 DMEM, 10% FBS. RAW264.7 mouse macrophages (TIB-71) and B16-F10 mouse melanoma cells  
433 (CRL-6475) were purchased from ATCC. For generation of stable *Bmal1* overexpressing  
434 RAW264.7 cells, the *Bmal1* coding sequence was cloned from mouse embryonic cDNA (forward  
435 primer: 5' GGCGAATTCGCGGACCAGAGAATGGAC 3'; reverse primer: 5'  
436 GGGCTCGAGCTACAGCGGCCATGGCAA 3') and subcloned into the pBABE retroviral  
437 expression vector (Addgene, 1764). Retroviral vectors were transfected into Phoenix packaging  
438 cells, followed by collection of supernatants containing retroviruses. RAW264.7 macrophages  
439 were incubated with retroviral supernatants with 4 µg/mL polybrene, and infected cells were  
440 selected with 4 µg/mL puromycin. Control cells were transduced with the empty pBABE vector.

441  
442 **Syngeneic tumor model and tumor measurement.** Male and female WT and M-BKO mice aged  
443 10-12 weeks were subcutaneously injected in the right flank with 300,000 B16-F10 mouse  
444 melanoma cells. For co-injection experiments, 500,000 B16-F10 cells were mixed with either  
445 500,000 WT or M-BKO BMDMs (differentiation for 6 day) in the right and left flanks,  
446 respectively. Tumor dimensions were measured every two days by caliper after all mice had  
447 palpable tumors, and tumor volume was calculated as  $L \times W \times W \times 0.52$  as previously  
448 described(Colegio et al., 2014). For DMM treatment, mice were switched to soft pellet, high fat  
449 diet (Bio-Serv, F3282) so that DMM can be mixed with the diet using a blender. The tumor growth  
450 rate was slower on high fat diet (Figure 7C) compared to normal chow (Figure 7A).

451

452 **RNA sequencing.** RNA-seq was performed on RNA from 3 biological replicates per treatment.  
453 Sequencing and raw data processing were conducted at the Institute of Molecular Biology (IMB)  
454 Genomics Core and IMB Bioinformatics Service Core, respectively, at Academia Sinica (Taipei,  
455 Taiwan, ROC). In brief, RNA was quantified using the Quant-iT ribogreen RNA reagent  
456 (ThermoFisher, R11491), and RNA quality was determined using a Bioanalyzer 2100 (Agilent;  
457 RIN>8, OD 260/280 and OD 260/230>1.8). RNA libraries were prepared using the TruSeq  
458 Stranded mRNA Library Preparation Kit (Illumina, RS-122-2101). Sequencing was analyzed with  
459 an Illumina NextSeq 500 instrument. Raw data were analyzed using the CLC Genomics  
460 Workbench. Raw sequencing reads were trimmed by removing adapter sequences, low-quality  
461 sequences (Phred quality score of < 20) and sequences >25 bp in length and mapped to the mouse  
462 genome assembly (mm10) from University of California, Santa Cruz, using the following  
463 parameters: mismatches = 2, minimum fraction length = 0.9, minimum fraction similarity = 0.9,  
464 and maximum hits per read = 5. Gene expression was determined by the number of transcripts per  
465 kilobase million. Functional annotation clustering of differentially regulated genes was done using  
466 DAVID (<https://david-d.ncifcrf.gov/>), and the interaction maps of transcriptional regulators that  
467 were induced or repressed by M1 activation shown in Figure 1 supplemental figure 1A were  
468 generated using STRING (<https://string-db.org/>). Significantly changed genes were determined by  
469  $p < 0.05$  and FDR < 0.05.

470

471 **qPCR.** Relative gene expression was determined by real-time qPCR with SYBR Green. The  
472 expression of the ribosomal subunit *36b4* (*Rplp0*) was used as an internal control to normalize  
473 expression data. Primer sequences are listed below:

474

475

| Gene                | Forward primer (5' to 3') | Reverse primer (5' to 3') |
|---------------------|---------------------------|---------------------------|
| <i>36b4 (Rplp0)</i> | AGATGCAGCAGATCCGCAT       | GTTCTTGCCCATCAGCACC       |
| <i>Arg1</i>         | CGTAGACCCTGGGGAACACTAT    | TCCATCACCTTGCCAATCCC      |
| <i>Bckdhb</i>       | TGGGGCTCTCTACCATTCTCA     | GGGGTATTACCACCTTGATCCC    |
| <i>Bmal1</i>        | AGGATCAAGAATGCAAGGGAGG    | TGAAACTGTTTCATTTTGTCCCGA  |
| <i>cMyc</i>         | CAGCGACTCTGAAGAAGAGCA     | GACCTCTTGGCAGGGGTTTG      |
| <i>Cry1</i>         | CACTGGTTCCGAAAGGGACTC     | CTGAAGCAAAAATCGCCACCT     |
| <i>Gclc</i>         | CATCCTCCAGTTCCTGCACA      | ATGTACTCCACCTCGTCACC      |
| <i>Hif1a</i>        | GAACGAGAAGAAAAATAGGATGAGT | ACTCTTTGCTTCGCCGAGAT      |
| <i>Hmox1</i>        | CAGAGCCGTCTCGAGCATAG      | CAAATCCTGGGGCATGCTGT      |
| <i>Il1b</i>         | AGCTTCAGGCAGGCAGTATC      | AAGGTCCACGGGAAAGACAC      |
| <i>Ldha</i>         | GCGTCTCCCTGAAGTCTCTT      | GCCCAGGATGTGTAACCTTT      |
| <i>Mgl2</i>         | CCTTGCGTTTGTCAAAACATGAC   | CTGAGGCTTATGGAAGTGGGC     |
| <i>Mmsdh</i>        | GAGGCCTCAGGTGGTTGAG       | GATAGATGGCATGGTCTCTCCC    |
| <i>Nfe2l2</i>       | GGTTGCCACATTCCCAAAC       | GCAAGCGACTCATGGTCATC      |
| <i>Nfkb1</i>        | CCTGCTTCTGGAGGGTGATG      | GCCGCTATATGCAGAGGTGT      |
| <i>Nqo1</i>         | TCTCTGGCCGATTCAAGAGTG     | TGCTGTAAACCAGTTGAGGTTC    |
| <i>Nr1d2</i>        | TCATGAGGATGAACAGGAACCG    | CGGCCAAATCGAACAGCATC      |
| <i>Ppard</i>        | CAGCCTCAACATGGAATGTC      | TCCGATCGCACTTCTCATAAC     |
| <i>Pparg</i>        | CAGGAGCCTGTGAGACCAAC      | ACCGCTTCTTTCAAATCTTGCTG   |
| <i>Slc7a2</i>       | CCCGGGATGGCTTACTGTTT      | AGGCCATCACAGCAGAAATGA     |
| <i>Slc7a8</i>       | GAACCACCCGGGTTCTGAC       | TGATGTTCCCTACAATGATACCACA |
| <i>Slc7a11</i>      | ATCTCCCCCAAGGGCATACT      | GCATAGGACAGGGCTCCAAA      |
| <i>Stat3</i>        | TGGCAGTTCTCGTCCAC         | CCAGCCATGTTTTCTTTTGC      |

476

477

478 **Western blot.** Standard Tris-Glycine SDS-PAGEs were run and transferred to PVDF membranes  
479 by wet transfer. Membranes were incubated with primary antibodies in TBST buffer with 1% BSA  
480 overnight. ECL signal was imaged using a BioRad ChemiDoc XRS+ imaging system. The  
481 antibody for Bmal1 (sc365645) was from Santa Cruz. The antibody for Hif-1 $\alpha$  (NB100-449) was  
482 from Novus Biologicals. The antibodies for  $\beta$ -tubulin (2146) and  $\beta$ -actin (4970) were from Cell  
483 Signaling Technology.

484

485 **Extracellular flux analyses.** Extracellular flux experiments were done using a Seahorse XF24  
486 analyzer (Agilent) and FluxPaks (Agilent, 100850-001). 200,000 BMDMs, splenic/peritoneal

487 macrophages or RAW264.7 cells were seeded into Seahorse XF24 plates for extracellular flux  
488 experiments. Minimal DMEM (pH 7.4) without phenol red and containing energy substrates as  
489 indicated was used as assay medium. 2% dialyzed FBS was added to media for experiments where  
490 LPS was injected during the assay to enhance responsiveness to LPS. Assay measurements were  
491 normalized to total protein content.

492  
493 **Glucose uptake assay.** BMDMs were plated at a density of 1 million cells per well in 12-well  
494 plates and stimulated as indicated. Cells were then washed with Krebs-Ringer bicarbonate HEPES  
495 (KRBH) buffer and then given 400  $\mu$ L with KRBH buffer loaded with 0.8  $\mu$ Ci/well [ $^3$ H]-2-  
496 deoxyglucose (PerkinElmer, NET549A001MC) and 0.5 mM unlabeled 2-deoxyglucose and  
497 incubated at 37°C for 30 minutes. 10  $\mu$ L of 1.5 mM Cytochalasin B (Cayman Chemical, 11328)  
498 was then added to stop glucose uptake. 400  $\mu$ L of lysate was used to measure levels [ $^3$ H]-2-  
499 deoxyglucose by a scintillation counter, and the remaining lysate was used to measure total protein  
500 content for normalization.

501  
502 **Measurement of lactic acid secretion.** Lactic acid was measured in the supernatants of BMDMs  
503 using the Biovision Lactate Colorimetric Kit (K627) according to the manufacturer's protocol.  
504 Readings were normalized to total cellular protein content.

505  
506 **Mitochondrial isolation.** Mitochondria were isolated from primary BMDMs by differential  
507 centrifugation. In brief, cells were resuspended in 500  $\mu$ L of ice-cold mitochondrial isolation  
508 buffer consisting of 70 mM sucrose, 50 mM Tris, 50 mM KCl, 10 mM EDTA, and 0.2% fatty-acid  
509 free BSA (pH 7.2) and then extruded through 29-gauge syringes 20 times. Lysates were spun at



510 800g to pellet nuclei, and supernatants were spun at 8,000g to isolate mitochondria. Pelleted  
511 mitochondria were washed once more with 500  $\mu$ L of mitochondria isolation buffer. Total  
512 mitochondrial protein content was determined by BCA assay.

513

514 **ETC activity assays in isolated mitochondria.** The activities of ETC complexes I-IV were  
515 measured in isolated mitochondria using colorimetric assays as previously described (Spinazzi et  
516 al., 2012) with modifications. In brief, 15  $\mu$ g of mitochondria were loaded per reaction for  
517 complexes III and IV, and 30 and 50  $\mu$ g were used for complexes II and I, respectively. Complex  
518 I activity was determined by the decrease in absorbance at 340 nm corresponding to reduction of  
519 ubiquinone by electrons from NADH. Complex II activity was determined by the decrease in  
520 absorbance at 600 nm corresponding to reduction of decylubiquinone by electrons from succinate.  
521 Complex III activity was determined by the increase in absorbance at 550 nm corresponding to  
522 reduction of cytochrome C. Complex IV activity was determined by decrease in absorbance at  
523 550 nm corresponding to oxidation of cytochrome C.

524

525 **Flow cytometry.** For flow cytometry, BMDMs were seeded into low attachment plates for  
526 indicated treatments and resuspended by pipetting. Mitochondrial content in BMDMs was  
527 determined by flow cytometry of live cells stained with 100  $\mu$ M Mitotracker Green FM  
528 (ThermoFisher, M7514) according to the manufacturer's instructions.

529 For flow cytometry of tumor-infiltrating lymphocytes, cells were stimulated *ex vivo* with  
530 20 ng/mL phorbol 12-myristate 13-acetate, or PMA, (Sigma-Aldrich, P8139) and 1  $\mu$ g/mL  
531 ionomycin (Sigma-Aldrich, I0634) for 4 hours and co-treated with brefeldin A (Cell Signaling  
532 Technology, 9972) to inhibit cytokine release. Cells were stained with the fixable viability dye

533 eFluor 455uv (ThermoFisher, 65-868-14) for 20 minutes at 4°C in FACS buffer (2% FBS and 1  
534 mM EDTA in PBS), washed, and incubated with antibodies against indicated surface antigens for  
535 30 min at 4°C. Cells were then washed twice and fixed with 2% paraformaldehyde for 1 hour at  
536 4°C and resuspended and stored in FACS buffer prior to downstream analysis. Immediately before  
537 flow cytometric analysis, cells were permeabilized for intracellular staining using the  
538 Foxp3/Transcription factor staining buffer set (ThermoFisher, 00-5523-00) according to the  
539 manufacturer's instructions. Of viable cells, CD8<sup>+</sup> T cells were identified as CD45<sup>+</sup> CD3<sup>+</sup> CD8a<sup>+</sup>  
540 cells and NK cells were identified by CD45<sup>+</sup> CD3<sup>-</sup> NK1.1<sup>+</sup> staining. Antibodies for PerCp/Cy5.5-  
541 conjugated CD45 (103132), PE/Cy7-conjugated CD3e (100320), Alexa Fluor 700-conjugated  
542 CD8a (100730) and APC-conjugated NK1.1 (108710) were from Biolegend. The antibody for PE-  
543 conjugated Ifn- $\gamma$  (12-7311-81) was from ThermoFisher Scientific.

544 To measure ROS production by isolated mitochondria, 15  $\mu$ g of mitochondria were  
545 resuspended in 500  $\mu$ L mitochondrial isolation buffer containing 5  $\mu$ M MitoSox Red  
546 (ThermoFisher, M36008) and 100  $\mu$ M MitoTracker Green FM with or without 10 mM sodium  
547 succinate. Mitochondria were incubated for 20 minutes at room temperature, washed with isolation  
548 buffer, and resuspended for flow cytometry. Mitochondria were identified by side scatter and  
549 positive MitoTracker Green staining for measurement of mean MitoSox Red intensity per  
550 population.

551  
552 **Steady-state metabolomics.** Untargeted metabolomics analysis using GC-TOF mass  
553 spectrometry was conducted by the West Coast Metabolomics Center at UC Davis. In brief, 10  
554 million cells were lifted, pelleted, and washed twice with PBS for each replicate. Cell lysates were  
555 homogenized by metal bead beating, and metabolites were extracted using 80% methanol.

556 Following extraction, cell pellets were solubilized using Tris-HCl Urea buffer (pH 8.0) containing  
557 1% SDS to measure cellular protein content for each sample. All metabolite readings were  
558 normalized to total protein content.

559

560 **Collection of tumor-conditioned medium.** Mice bearing subcutaneous B16-F10 tumors were  
561 sacrificed 20 days after injection with 500,000 cells. Tumors were dissected and weighed. Tumors  
562 were minced in growth medium containing 10% dialyzed FBS in high glucose DMEM (5 mL per  
563 gram of tissue) and incubated at 37°C for 2 hours. Conditioned medium was collected and filtered  
564 through 100 µm strainer followed by three spins at 1,000 rpm to pellet and remove residual  
565 cells/debris from the medium.

566

567 **Isolation of tumor-infiltrating immune cells.** Subcutaneous mouse tumors were dissected,  
568 weighed, and then placed in 6-well plates with growth medium (RPMI, 5% FBS) and minced.  
569 Minced tissues were combined into three groups per genotype, spun down in 50 mL conical tubes,  
570 and resuspended in 20 mL digestion buffer (0.5 mg/mL collagenase IV, 0.1 mg/mL DNase I in  
571 HBSS medium). Tumors were digested at 37°C with gentle shaking for 30 minutes and vortexed  
572 every 10 minutes. Contents were filtered through a 100 µm mesh, and cells were pelleted and  
573 resuspended in 45% percoll in 1X HBSS and 1X PBS. Cells were spun at 2,000 rpm at 4°C with  
574 a swing bucket rotor for 20 minutes. The supernatant was aspirated, and the pellet was briefly  
575 resuspended in 5 mL ACK buffer to lyse red blood cells. Lastly, cells were pelleted and  
576 resuspended in growth medium for downstream applications.

577 To isolate F4/80<sup>+</sup> cells from tumors, tissues were homogenized and processed as above to  
578 collect tumor-infiltrating leukocytes. F4/80<sup>+</sup> cells were then isolated by positive selection using a

579 rat anti-F4/80 antibody (Biolegend, 123120) and sheep anti-rat Dynabeads (ThermoFisher  
580 Scientific, 11035) according to the manufacturer's instructions.

581

582 **Statistical analysis.** All data are presented as mean  $\pm$  SEM. GraphPad Prism 7 was used for  
583 statistical analyses. Two-tailed Student's t test was used for comparisons of two parameters. Two-  
584 way ANOVA was used for multi-parameter analyses for time course comparisons. Cell-based  
585 experiments were performed with 3-5 biological replicates (cell culture replicates). For tumor  
586 volume, outliers were determined using a Rout test ( $p < 0.05$ ), and outliers were omitted from  
587 downstream experiments.

588

589

590 **ACKNOWLEDGEMENTS**

591 We thank Drs. D. Cohen, D. Sinclair, and P. Weller for critical comments, A. Yesian, L. Dai, P.  
592 Basak, R. Chen, P. Hu, and F. Onal for technical help and the Academia Sinica (Taipei, Taiwan,  
593 ROC) for RNA sequencing/data analysis (IMB Genomics Core and Bioinformatics Service Core)  
594 and grant support (AS-106-TP-L08 to N.S.L.: AS-106-TP-L08-1 and AS-106-TP-L08-3). Y.H.L.  
595 was supported by funds from Ministry of Science and Technology, Taiwan, ROC. This work was  
596 supported by grants from NIH (F31GM117854 to R.K.A.; F31DK107256 to N.H.K.;  
597 R01DK113791 and R21AI131659 to C.H.L) and American Heart Association (16GRNT31460005  
598 to C.H.L.).

599

600 **AUTHOR CONTRIBUTIONS**

601 R.K.A., Y.H.L., N.H.K., K.A.S., and C.X. performed the experiments. A.L.H., S.L., and D.J.  
602 generated reagents. N.S.L. assisted with RNA-seq data analysis. R.K.A. and C.H.L.  
603 conceptualized the study, designed experiments, interpreted data, and wrote the manuscript.  
604 C.H.L. supervised the study.

605

606 **COMPETING INTERESTS**

607 The authors declare no competing interests.

608

## 609 REFERENCES

- 610 Andrejeva, G., & Rathmell, J. C. (2017). Similarities and Distinctions of Cancer and Immune  
611 Metabolism in Inflammation and Tumors. *Cell Metab*, 26(1), 49-70.  
612 doi:10.1016/j.cmet.2017.06.004  
613
- 614 Arts, R. J., Plantinga, T. S., Tuit, S., Ulas, T., Heinhuis, B., Tesselaar, M., . . . Netea-Maier, R. T.  
615 (2016). Transcriptional and metabolic reprogramming induce an inflammatory phenotype  
616 in non-medullary thyroid carcinoma-induced macrophages. *Oncoimmunology*, 5(12),  
617 e1229725. doi:10.1080/2162402X.2016.1229725  
618
- 619 Bell, E. L., Klimova, T. A., Eisenbart, J., Moraes, C. T., Murphy, M. P., Budinger, G. R., &  
620 Chandel, N. S. (2007). The Qo site of the mitochondrial complex III is required for the  
621 transduction of hypoxic signaling via reactive oxygen species production. *J Cell Biol*,  
622 177(6), 1029-1036. doi:10.1083/jcb.200609074  
623
- 624 Buck, M. D., Sowell, R. T., Kaech, S. M., & Pearce, E. L. (2017). Metabolic Instruction of  
625 Immunity. *Cell*, 169(4), 570-586. doi:10.1016/j.cell.2017.04.004  
626
- 627 Canaple, L., Rambaud, J., Dkhissi-Benyahya, O., Rayet, B., Tan, N. S., Michalik, L., . . . Laudet,  
628 V. (2006). Reciprocal regulation of brain and muscle Arnt-like protein 1 and peroxisome  
629 proliferator-activated receptor alpha defines a novel positive feedback loop in the rodent  
630 liver circadian clock. *Mol Endocrinol*, 20(8), 1715-1727. doi:10.1210/me.2006-0052  
631
- 632 Chouchani, E. T., Pell, V. R., Gaude, E., Aksentijevic, D., Sundier, S. Y., Robb, E. L., . . . Murphy,  
633 M. P. (2014). Ischaemic accumulation of succinate controls reperfusion injury through  
634 mitochondrial ROS. *Nature*, 515(7527), 431-435. doi:10.1038/nature13909  
635
- 636 Christensen, H. N., Handlogten, M. E., Lam, I., Tager, H. S., & Zand, R. (1969). A Bicyclic Amino  
637 Acid to Improve Discriminations among Transport Systems. *Journal of Biological*  
638 *Chemistry*, 244(6), 1510-1520.  
639
- 640 Colegio, O. R., Chu, N. Q., Szabo, A. L., Chu, T., Rhebergen, A. M., Jairam, V., . . . Medzhitov,  
641 R. (2014). Functional polarization of tumour-associated macrophages by tumour-derived  
642 lactic acid. *Nature*, 513(7519), 559-563. doi:10.1038/nature13490  
643
- 644 Cramer, T., Yamanishi, Y., Clausen, B. E., Förster, I., Pawlinski, R., Mackman, N., . . . Johnson,  
645 R. S. (2003). HIF-1alpha is essential for myeloid cell-mediated inflammation. *Cell*, 112(5),  
646 645-657.  
647
- 648 Dai, L., Bhargava, P., Stanya, K. J., Alexander, R. K., Liou, Y.-H., Jacobi, D., . . . Lee, C.-H.  
649 (2017). Macrophage alternative activation confers protection against lipotoxicity-induced  
650 cell death. *Molecular Metabolism*, 6(10), 1186-1197. doi:10.1016/j.molmet.2017.08.001  
651
- 652 Damiola, F., Le Minh, N., Preitner, N., Kornmann, B., Fleury-Olela, F., & Schibler, U. (2000).  
653 Restricted feeding uncouples circadian oscillators in peripheral tissues from the central  
pacemaker in the suprachiasmatic nucleus. *Genes & development*, 14(23), 2950-2961.

- 654  
655 Doedens, A. L., Stockmann, C., Rubinstein, M. P., Liao, D., Zhang, N., DeNardo, D. G., . . .  
656 Johnson, R. S. (2010). Macrophage expression of hypoxia-inducible factor-1 alpha  
657 suppresses T-cell function and promotes tumor progression. *Cancer Res*, *70*(19), 7465-  
658 7475. doi:10.1158/0008-5472.CAN-10-1439  
659
- 660 Early, J. O., Menon, D., Wyse, C. A., Cervantes-Silva, M. P., Zaslona, Z., Carroll, R. G., . . .  
661 Curtis, A. M. (2018). Circadian clock protein BMAL1 regulates IL-1beta in macrophages  
662 via NRF2. *Proc Natl Acad Sci U S A*, *115*(36), E8460-E8468.  
663 doi:10.1073/pnas.1800431115  
664
- 665 Fukuzumi, M., Shinomiya, H., Shimizu, Y., Ohishi, K., & Utsumi, S. (1996). Endotoxin-induced  
666 enhancement of glucose influx into murine peritoneal macrophages via GLUT1. *Infection  
667 and immunity*, *64*(1), 108-112.  
668
- 669 Ganeshan, K., & Chawla, A. (2014). Metabolic regulation of immune responses. *Annu Rev  
670 Immunol*, *32*, 609-634. doi:10.1146/annurev-immunol-032713-120236  
671
- 672 Geiger, R., Rieckmann, J. C., Wolf, T., Basso, C., Feng, Y., Fuhrer, T., . . . Lanzavecchia, A.  
673 (2016). L-Arginine Modulates T Cell Metabolism and Enhances Survival and Anti-tumor  
674 Activity. *Cell*, *167*(3), 829-842.e813. doi:10.1016/j.cell.2016.09.031  
675
- 676 Hardin, P. E., & Panda, S. (2013). Circadian timekeeping and output mechanisms in animals.  
677 *Current Opinion in Neurobiology*, *23*(5), 724-731. doi:10.1016/j.conb.2013.02.018  
678
- 679 Hotamisligil, G. S. (2017). Foundations of Immunometabolism and Implications for Metabolic  
680 Health and Disease. *Immunity*, *47*(3), 406-420. doi:10.1016/j.immuni.2017.08.009  
681
- 682 Jaakkola, P., Mole, D. R., Tian, Y.-M., Wilson, M. I., Gielbert, J., Gaskell, S. J., . . . Ratcliffe, P.  
683 J. (2001). Targeting of HIF- $\alpha$  to the von Hippel-Lindau Ubiquitylation Complex by  
684 O<sub>2</sub>-Regulated Prolyl Hydroxylation. *Science*, *292*, 468-472.  
685
- 686 Jacobi, D., Liu, S., Burkewitz, K., Kory, N., Knudsen, Nelson H., Alexander, Ryan K., . . . Lee,  
687 C.-H. (2015). Hepatic Bmal1 Regulates Rhythmic Mitochondrial Dynamics and Promotes  
688 Metabolic Fitness. *Cell Metabolism*, *22*(4), 709-720. doi:10.1016/j.cmet.2015.08.006  
689
- 690 Kang, K., Reilly, S. M., Karabacak, V., Gangl, M. R., Fitzgerald, K., Hatano, B., & Lee, C.-H.  
691 (2008). Adipocyte-derived Th2 cytokines and myeloid PPARdelta regulate macrophage  
692 polarization and insulin sensitivity. *Cell Metabolism*, *7*(6), 485-495.  
693 doi:10.1016/j.cmet.2008.04.002  
694
- 695 Lamas, B., Vergnaud-Gauduchon, J., Goncalves-Mendes, N., Perche, O., Rossary, A., Vasson, M.  
696 P., & Farges, M. C. (2012). Altered functions of natural killer cells in response to L-  
697 Arginine availability. *Cell Immunol*, *280*(2), 182-190. doi:10.1016/j.cellimm.2012.11.018  
698

- 699 Lampropoulou, V., Sergushichev, A., Bambouskova, M., Nair, S., Vincent, Emma E.,  
700 Loginicheva, E., . . . Artyomov, Maxim N. (2016). Itaconate Links Inhibition of Succinate  
701 Dehydrogenase with Macrophage Metabolic Remodeling and Regulation of Inflammation.  
702 *Cell Metabolism*, 24(1), 158-166. doi:10.1016/j.cmet.2016.06.004  
703
- 704 Lee, C.-H., Kang, K., Mehl, I. R., Nofsinger, R., Alaynick, W. A., Chong, L.-W., . . . Evans, R.  
705 M. (2006). Peroxisome proliferator-activated receptor  $\delta$  promotes very low-density  
706 lipoprotein-derived fatty acid catabolism in the macrophage. *Proceedings of the National  
707 Academy of Sciences*, 103, 2434-2439.  
708
- 709 Li, F., Wang, Y., Zeller, K. I., Potter, J. J., Wonsey, D. R., O'Donnell, K. A., . . . Dang, C. V.  
710 (2005). Myc Stimulates Nuclearly Encoded Mitochondrial Genes and Mitochondrial  
711 Biogenesis. *Molecular and Cellular Biology*, 25(14), 6225-6234.  
712 doi:10.1128/mcb.25.14.6225-6234.2005  
713
- 714 Liu, D., Chang, C., Lu, N., Wang, X., Lu, Q., Ren, X., . . . Tang, L. (2017). Comprehensive  
715 Proteomics Analysis Reveals Metabolic Reprogramming of Tumor-Associated  
716 Macrophages Stimulated by the Tumor Microenvironment. *J Proteome Res*, 16(1), 288-  
717 297. doi:10.1021/acs.jproteome.6b00604  
718
- 719 Liu, S., Brown, J. D., Stanya, K. J., Homan, E., Leidl, M., Inouye, K., . . . Lee, C.-H. (2013). A  
720 diurnal serum lipid integrates hepatic lipogenesis and peripheral fatty acid use. *Nature*,  
721 502(7472), 550-554. doi:10.1038/nature12710  
722
- 723 Marpegán, L., Bekinschtein, T. A., Costas, M. A., & Golombek, D. A. (2005). Circadian responses  
724 to endotoxin treatment in mice. *Journal of Neuroimmunology*, 160(1), 102-109.  
725 doi:10.1016/j.jneuroim.2004.11.003  
726
- 727 Masson, N., & Ratcliffe, P. J. (2014). Hypoxia signaling pathways in cancer metabolism: the  
728 importance of co-selecting interconnected physiological pathways. *Cancer & metabolism*,  
729 2(1), 3-3. doi:10.1186/2049-3002-2-3  
730
- 731 Mills, E. L., Kelly, B., Logan, A., Costa, A. S. H., Varma, M., Bryant, C. E., . . . O'Neill, L. A.  
732 (2016). Succinate Dehydrogenase Supports Metabolic Repurposing of Mitochondria to  
733 Drive Inflammatory Macrophages. *Cell*, 167(2), 457-470 e413.  
734 doi:10.1016/j.cell.2016.08.064  
735
- 736 Mills, E. L., Ryan, D. G., Prag, H. A., Dikovskaya, D., Menon, D., Zaslona, Z., . . . O'Neill, L. A.  
737 (2018). Itaconate is an anti-inflammatory metabolite that activates Nrf2 via alkylation of  
738 KEAP1. *Nature*, 556(7699), 113-117. doi:10.1038/nature25986  
739
- 740 Nguyen, K. D., Fentress, S. J., Qiu, Y., Yun, K., Cox, J. S., & Chawla, A. (2013). Circadian Gene  
741 Bmal1 Regulates Diurnal Oscillations of Ly6C<sup>hi</sup> Inflammatory Monocytes.  
742 *Science*, 341, 1483-1488.  
743



- 744 O'Callaghan, E. K., Anderson, S. T., Moynagh, P. N., & Coogan, A. N. (2012). Long-lasting  
745 effects of sepsis on circadian rhythms in the mouse. *PLoS One*, 7(10), e47087.  
746 doi:10.1371/journal.pone.0047087  
747
- 748 O'Neill, L. A., Kishton, R. J., & Rathmell, J. (2016). A guide to immunometabolism for  
749 immunologists. *Nat Rev Immunol*, 16(9), 553-565. doi:10.1038/nri.2016.70  
750
- 751 Odegaard, J. I., Ricardo-Gonzalez, R. R., Goforth, M. H., Morel, C. R., Subramanian, V.,  
752 Mukundan, L., . . . Chawla, A. (2007). Macrophage-specific PPARgamma controls  
753 alternative activation and improves insulin resistance. *Nature*, 447(7148), 1116-1120.  
754 doi:10.1038/nature05894  
755
- 756 Papagiannakopoulos, T., Bauer, Matthew R., Davidson, Shawn M., Heimann, M., Subbaraj, L.,  
757 Bhutkar, A., . . . Jacks, T. (2016). Circadian Rhythm Disruption Promotes Lung  
758 Tumorigenesis. *Cell Metabolism*, 24(2), 324-331. doi:10.1016/j.cmet.2016.07.001  
759
- 760 Peek, C. B., Affinati, A. H., Ramsey, K. M., Kuo, H. Y., Yu, W., Sena, L. A., . . . Bass, J. (2013).  
761 Circadian clock NAD<sup>+</sup> cycle drives mitochondrial oxidative metabolism in mice. *Science*,  
762 342(6158), 1243417. doi:10.1126/science.1243417  
763
- 764 Penny, H. L., Sieow, J. L., Adriani, G., Yeap, W. H., See Chi Ee, P., San Luis, B., . . . Wong, S.  
765 C. (2016). Warburg metabolism in tumor-conditioned macrophages promotes metastasis  
766 in human pancreatic ductal adenocarcinoma. *Oncoimmunology*, 5(8), e1191731.  
767 doi:10.1080/2162402X.2016.1191731  
768
- 769 Robb, E. L., Hall, A. R., Prime, T. A., Eaton, S., Szibor, M., Viscomi, C., . . . Murphy, M. P.  
770 (2018). Control of mitochondrial superoxide production by reverse electron transport at  
771 complex I. *J Biol Chem*, 293(25), 9869-9879. doi:10.1074/jbc.RA118.003647  
772
- 773 Rodriguez-Prados, J. C., Traves, P. G., Cuenca, J., Rico, D., Aragonés, J., Martín-Sanz, P., . . .  
774 Bosca, L. (2010). Substrate fate in activated macrophages: a comparison between innate,  
775 classic, and alternative activation. *J Immunol*, 185(1), 605-614.  
776 doi:10.4049/jimmunol.0901698  
777
- 778 Segawa, H., Fukasawa, Y., Miyamoto, K.-i., Takeda, E., Endou, H., & Kanai, Y. (1999).  
779 Identification and Functional Characterization of a Na<sup>+</sup>-independent Neutral Amino Acid  
780 Transporter with Broad Substrate Selectivity. *Journal of Biological Chemistry*, 274(28),  
781 19745-19751.  
782
- 783 Semenza, G. L., Roth, P. H., Fang, H. M., & Wang, G. L. (1994). Transcriptional regulation of  
784 genes encoding glycolytic enzymes by hypoxia-inducible factor 1. *Journal of Biological*  
785 *Chemistry*, 269(38), 23757-23763.  
786
- 787 Sinclair, L. V., Rolf, J., Emslie, E., Shi, Y. B., Taylor, P. M., & Cantrell, D. A. (2013). Control of  
788 amino-acid transport by antigen receptors coordinates the metabolic reprogramming  
789 essential for T cell differentiation. *Nat Immunol*, 14(5), 500-508. doi:10.1038/ni.2556

- 790  
791 Spinazzi, M., Casarin, A., Pertegato, V., Salviati, L., & Angelini, C. (2012). Assessment of  
792 mitochondrial respiratory chain enzymatic activities on tissues and cultured cells. *Nat*  
793 *Protoc*, 7(6), 1235-1246. doi:10.1038/nprot.2012.058  
794  
795 Steggerda, S. M., Bennett, M. K., Chen, J., Emberley, E., Huang, T., Janes, J. R., . . . Gross, M. I.  
796 (2017). Inhibition of arginase by CB-1158 blocks myeloid cell-mediated immune  
797 suppression in the tumor microenvironment. *J Immunother Cancer*, 5(1), 101.  
798 doi:10.1186/s40425-017-0308-4  
799  
800 Tamaru, T., Isojima, Y., van der Horst, G. T. J., Takei, K., Nagai, K., & Takamatsu, K. (2003).  
801 Nucleocytoplasmic shuttling and phosphorylation of BMAL1 are regulated by circadian  
802 clock in cultured fibroblasts. *Genes to Cells*, 8(12), 973-983. doi:10.1046/j.1365-  
803 2443.2003.00686.x  
804  
805 Tannahill, G. M., Curtis, A. M., Adamik, J., Palsson-McDermott, E. M., McGettrick, A. F., Goel,  
806 G., . . . O'Neill, L. A. (2013). Succinate is an inflammatory signal that induces IL-1beta  
807 through HIF-1alpha. *Nature*, 496(7444), 238-242. doi:10.1038/nature11986  
808  
809 Tsukishiro, T., Shimizu, Y., Higuchi, K., & Watanabe, A. (2000). Effect of branched-chain amino  
810 acids on the composition and cytolytic activity of liver-associated lymphocytes in rats.  
811 *Journal of Gastroenterology and Hepatology*, 15(8), 849-859. doi:10.1046/j.1440-  
812 1746.2000.02220.x  
813  
814 West, A. P., Brodsky, I. E., Rahner, C., Woo, D. K., Erdjument-Bromage, H., Tempst, P., . . .  
815 Ghosh, S. (2011). TLR signalling augments macrophage bactericidal activity through  
816 mitochondrial ROS. *Nature*, 472(7344), 476-480. doi:10.1038/nature09973  
817  
818 Xu, J. (2005). Preparation, Culture, and Immortalization of Mouse Embryonic Fibroblasts. *Current*  
819 *Protocols in Molecular Biology*, 70(1), 28.21.21-28.21.28.  
820 doi:doi:10.1002/0471142727.mb2801s70  
821  
822 Yang, X., Downes, M., Yu, R. T., Bookout, A. L., He, W., Straume, M., . . . Evans, R. M. (2006).  
823 Nuclear receptor expression links the circadian clock to metabolism. *Cell*, 126(4), 801-810.  
824 doi:10.1016/j.cell.2006.06.050  
825  
826 Zhang, H., Bosch-Marce, M., Shimoda, L. A., Tan, Y. S., Baek, J. H., Wesley, J. B., . . . Semenza,  
827 G. L. (2008). Mitochondrial Autophagy Is an HIF-1-dependent Adaptive Metabolic  
828 Response to Hypoxia. *Journal of Biological Chemistry*, 283(16), 10892-10903.  
829 doi:10.1074/jbc.M800102200  
830  
831

## FIGURES

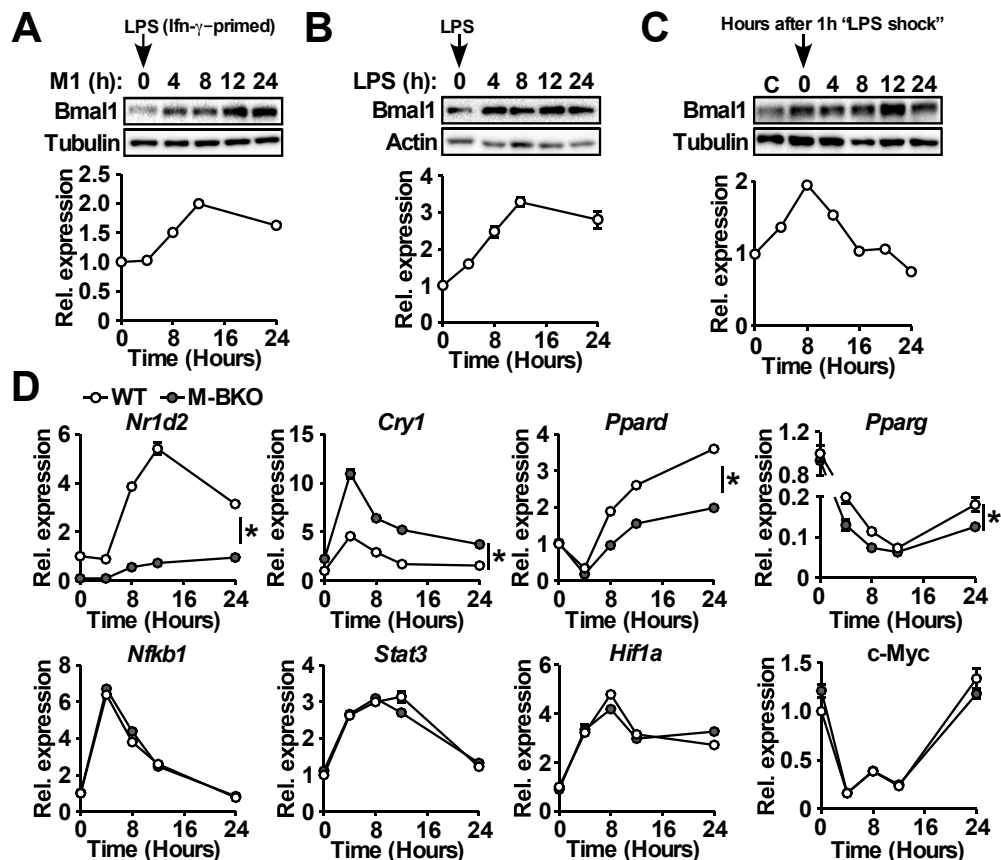

**Figure 1. Macrophage Bmal1 is induced by M1 activation.**

(A), (B), and (C) Bmal1 protein levels (top) and relative gene expression determined by qPCR (bottom) in bone marrow-derived macrophages during a 24-hour time course of M1 activation (10 ng/ml Ifn- $\gamma$  overnight priming + 10 ng/ml LPS) (A), treatment with LPS alone (100 ng/ml) (B), or acute LPS treatment for 1 hour (100 ng/mL) (C). For M1 and LPS only treatments, LPS was spiked in at time zero without medium change. For acute LPS treatment, cells were given with LPS for one hour followed by culture in DMEM, 2% FBS without LPS (time zero indicates medium change). N=3 biological replicates for qPCR. (D) Relative expression of circadian clock and inflammatory transcriptional regulators in M1-activated macrophages determined by qPCR. N=3 biological replicates, statistical analysis performed using 2-way ANOVA for WT vs. M-BKO across the time course. Data presented as mean  $\pm$  S.E.M. \*p<0.05. Experiments were repeated at least twice.

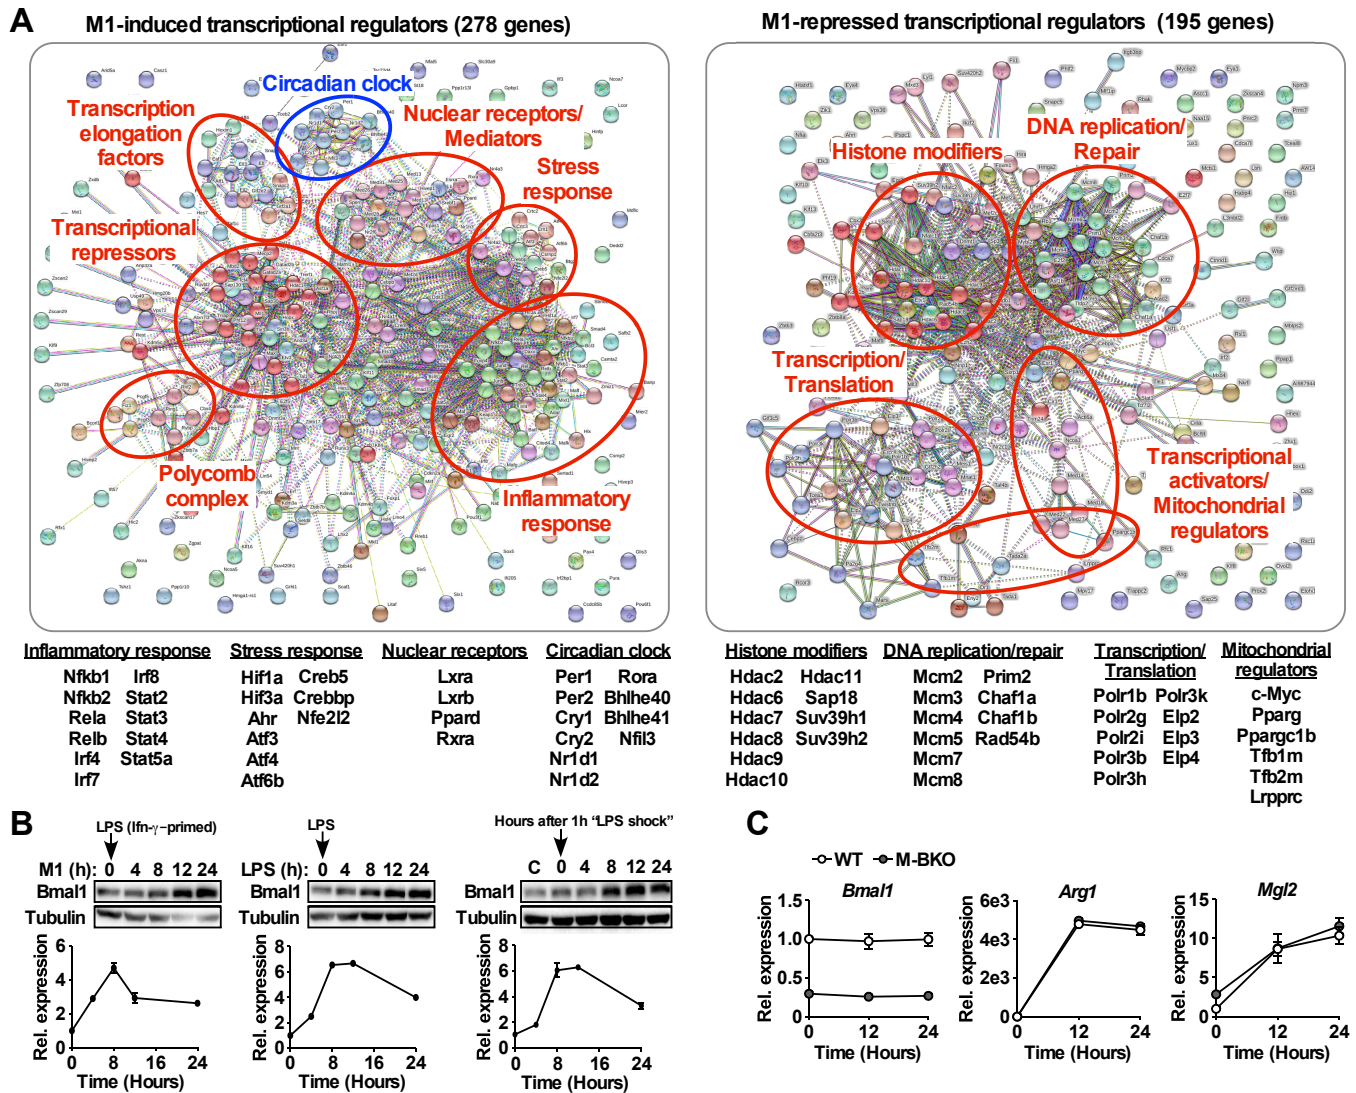

**Figure 1 supplemental figure 1. The circadian clock is a transcriptional module induced by M1 activation.**

(A) Annotated protein-protein interaction maps generated by STRING of transcriptional regulators that were significantly induced (left) or repressed (right) in WT macrophages by 8 hours M1 activation (Ifn- $\gamma$  priming followed by stimulation with 10 ng/mL LPS) compared to time-matched controls (Ifn- $\gamma$  priming without LPS), determined by RNA-seq ( $p < 0.05$ , FDR  $< 0.05$ , |F.C.|  $> 1.5$ ). N=3 biological replicates. F.C.: fold change. See Supplemental table 1 for the complete gene list. (B) Bmal1 protein levels (top panels) and relative gene expression determined by qPCR (bottom panels) in mouse embryonic fibroblasts during a 24 hour time course of M1 activation (10 ng/ml Ifn- $\gamma$  overnight priming + 10 ng/ml LPS, left panels), treatment with LPS only (100 ng/ml, middle panels), or 1-hour acute LPS treatment (100 ng/mL, right panels). For M1 and LPS only treatment, LPS was spiked in at time zero without medium change. For acute LPS treatment, cells were given with LPS for one hour followed by culture in DMEM, 2% FBS without LPS (time zero indicates medium change). N=3 biological replicates for qPCR. (C) Gene expression during a 24-hour time course of Il-4 treatment in WT and M-BKO macrophages determined by qPCR. N=3 biological replicates. Data presented as mean  $\pm$  S.E.M. \* $p < 0.05$ . Cell culture experiments were repeated at least twice.

**Figure 1 supplemental table 1. Transcriptional regulators differentially regulated in M1 activated macrophages.**

Genes encoding transcriptional regulators that were significantly induced or repressed by 8h M1 stimulation ( $p < 0.05$ ,  $FDR < 0.05$ ,  $|F.C.| > 1.5$ ) in WT bone marrow derived macrophages were identified by gene ontology analysis using the DAVID platform. Differentially regulated genes that matched the Transcription GO term in the Biological Processes GO database (accession GO:0006350) were used to generate a protein-protein interaction map using String (Supplemental figure 1). Uncharacterized zinc finger proteins (ZFPs) were omitted from analyses by String. Genes are listed below:

**Induced (278 genes)**

|          |         |           |        |        |          |         |          |
|----------|---------|-----------|--------|--------|----------|---------|----------|
| ADAR     | CRY1    | GTF2A1    | KDM4B  | MNT    | PPP1R10  | SNAPC1  | ZKSCAN17 |
| AFF1     | CRY2    | GTF2E2    | KDM5B  | MXD1   | PPP1R13L | SNAPC2  | ZMIZ1    |
| AFF4     | CSRNP1  | GTF2F1    | KDM5C  | MXI1   | PTOV1    | SOX5    | ZSCAN2   |
| AHR      | CSRNP2  | HBP1      | KEAP1  | MYB    | PTRF     | SPEN    | ZSCAN29  |
| AKNA     | DAXX    | HDAC1     | KLF11  | NAB2   | PURA     | SPIC    | ZXDB     |
| ANP32A   | DDIT3   | HES1      | KLF16  | NACC1  | RBPJ     | SREBF1  |          |
| ARHGAP22 | DDX54   | HES7      | KLF4   | NCOA5  | RCOR2    | SRF     |          |
| ARID3A   | DEDD2   | HEXIM1    | KLF7   | NCOA7  | REL      | ST18    |          |
| ARID5A   | DNMT3A  | HIC1      | KLF9   | NCOR2  | RELA     | STAT2   |          |
| ARNT2    | DPF1    | HIC2      | LCOR   | NFAT5  | RELB     | STAT3   |          |
| ASF1A    | DRAP1   | HIF1A     | LCORL  | NFE2L2 | REST     | STAT4   |          |
| ATF3     | E2F5    | HIF3A     | LHX2   | NFIL3  | RFX1     | STAT5A  |          |
| ATF4     | E4F1    | HINFP     | LIN54  | NFKB1  | RING1    | TAF1C   |          |
| ATF6B    | EAF1    | HIVEP1    | LITAF  | NFKB2  | RNF2     | TAF7    |          |
| ATXN7L3  | EDF1    | HIVEP2    | LMO4   | NFKBIZ | RORA     | TAL1    |          |
| BANP     | EGR2    | HIVEP3    | MAF    | NOTCH1 | RREB1    | TBL1X   |          |
| BATF     | EID3    | HLX       | MAFF   | NPTXR  | RSLCAN18 | TCEB2   |          |
| BCL3     | EIF2C1  | HMG20B    | MAFG   | NR1D1  | RUNX2    | TCF4    |          |
| BCL6     | ELK1    | HMGA1     | MAFK   | NR1D2  | RUNX3    | TGIF1   |          |
| BCORL1   | ELL     | HMGA1-RS1 | MAML1  | NR1H2  | RUVBL2   | THAP7   |          |
| BHLHE40  | ELL2    | HMGN5     | MAX    | NR1H3  | RXRA     | TLE2    |          |
| BHLHE41  | ELL3    | HOPX      | MBD2   | NR2F6  | RYBP     | TLE3    |          |
| BRWD1    | EPAS1   | HSF4      | MDFIC  | NR4A1  | SAFB2    | TRERF1  |          |
| BTG2     | ERF     | IFI205    | MECP2  | NR4A2  | SAP130   | TRIB3   |          |
| CAMTA2   | ERN1    | IFT57     | MED13  | NR4A3  | SAP30    | TRRAP   |          |
| CASZ1    | ESRRA   | ILF3      | MED13L | PAF1   | SBNO2    | TSC22D4 |          |
| CBX4     | ETS1    | ING2      | MED15  | PAX4   | SCAF1    | TSHZ1   |          |
| CCDC85B  | ETV3    | IRF2BP1   | MED25  | PCGF3  | SEC14L2  | USP49   |          |
| CDKN2A   | FIZ1    | IRF4      | MED26  | PCGF5  | SERTAD1  | VPS72   |          |
| CEBPB    | FLII    | IRF7      | MED28  | PER1   | SETD8    | WHSC1L1 |          |
| CEBPD    | FOXP1   | IRF8      | MED31  | PER2   | SFPI1    | ZBTB17  |          |
| CITED4   | FOXP4   | JARID2    | MEF2D  | PHF1   | SIN3B    | ZBTB24  |          |
| CREB5    | GATA2   | JDP2      | MIER2  | PHF12  | SIX1     | ZBTB46  |          |
| CREBBP   | GATAD2A | JMJD6     | MIER3  | PIAS4  | SIX5     | ZBTB7A  |          |
| CREBL2   | GATAD2B | JUN       | MITF   | PML    | SLC30A9  | ZBTB7B  |          |
| CREBZF   | GFI1    | JUNB      | MIXL1  | POU2F2 | SMAD3    | ZEB1    |          |
| CREM     | GLIS3   | JUND      | MKL1   | POU3F1 | SMAD4    | ZFHX4   |          |
| CRTC2    | GPBP1   | KDM3A     | MLL1   | POU6F1 | SMAD7    | ZGPAT   |          |
| CRTC3    | GRHL1   | KDM4A     | MNDA   | PPARD  | SMYD1    | ZHX2    |          |

## Repressed (195 genes)

---

|          |          |         |          |          |
|----------|----------|---------|----------|----------|
| ACTL6A   | ELK3     | IRF2    | NAA15    | SAP18    |
| AHRR     | ELP2     | ITGB3BP | NCOA1    | SAP25    |
| AI987944 | ELP3     | KDM2B   | NCOA3    | SETD7    |
| ANG      | ELP4     | KLF10   | NFATC1   | SETDB1   |
| ASCC1    | ENY2     | KLF13   | NFATC2   | SNAPC5   |
| ASF1B    | ERCC8    | KLF2    | NFIA     | SP3      |
| ATAD2    | ESR1     | KLF8    | NKRF     | SSBP2    |
| AW146154 | ETOH11   | L3MBTL2 | NPAT     | SSRP1    |
| BCL9L    | ETV1     | LBH     | NPM3     | STAT1    |
| CBFA2T3  | EYA1     | LRPPRC  | NR2C1    | SUV39H1  |
| CBX3     | EYA4     | LYL1    | NRIP1    | SUV39H2  |
| CBX6     | EZH2     | MAFB    | OVOL2    | SUV420H2 |
| CBX8     | FLI1     | MARS    | PA2G4    | TADA1    |
| CCNH     | FNTB     | MBTPS2  | PHF19    | TADA2A   |
| CDCA7    | FOXM1    | MCM2    | PHTF2    | TAF4B    |
| CDCA7L   | GTF2H2   | MCM3    | PNRC2    | TAF9B    |
| CEBPA    | GTF2I    | MCM4    | POLR1B   | TBX6     |
| CEBPG    | GTF2IRD1 | MCM5    | POLR2G   | TCEA3    |
| CEBPZ    | GTF3A    | MCM6    | POLR2I   | TCEAL8   |
| CHAF1A   | GTF3C5   | MCM7    | POLR3B   | TCF7L2   |
| CHAF1B   | HABP4    | MCM8    | POLR3H   | TFB1M    |
| CHD9     | HDAC10   | MCTS1   | POLR3K   | TFB2M    |
| CHURC1   | HDAC11   | MED14   | PPARG    | TFDP2    |
| CIITA    | HDAC2    | MED18   | PPARGC1B | THOC1    |
| CIR1     | HDAC6    | MED22   | PRIM1    | TLE1     |
| CREB3    | HDAC7    | MED27   | PRIM2    | TRAPPC2  |
| CREB3L1  | HDAC8    | MEF2A   | PRMT7    | TRIM24   |
| CREB3L2  | HDAC9    | MEF2C   | PROX2    | TWISTNB  |
| CTNND1   | HELLS    | MEIS1   | PSPC1    | TXNIP    |
| CUX1     | HHEX     | MLF1IP  | RAD54B   | UHRF1    |
| DDI2     | HIP1     | MLL3    | RB1      | USF1     |
| DNMT1    | HIRA     | MLLT3   | RBAK     | VGLL4    |
| DR1      | HMBOX1   | MNAT1   | RCBTB1   | VPS36    |
| E2F1     | HMGA2    | MPV17   | RCOR3    | WTIP     |
| E2F2     | HOXA1    | MXD3    | RERE     | ZBTB3    |
| E2F6     | HTATSF1  | MXD4    | RFC1     | ZBTB8A   |
| E2F7     | IKBKAP   | MYBL2   | RPAP1    | ZHX1     |
| E2F8     | IKZF2    | MYC     | RSC1A1   | ZIK1     |
| EGR3     | IL16     | MYCBP2  | RSL1     | ZKSCAN4  |

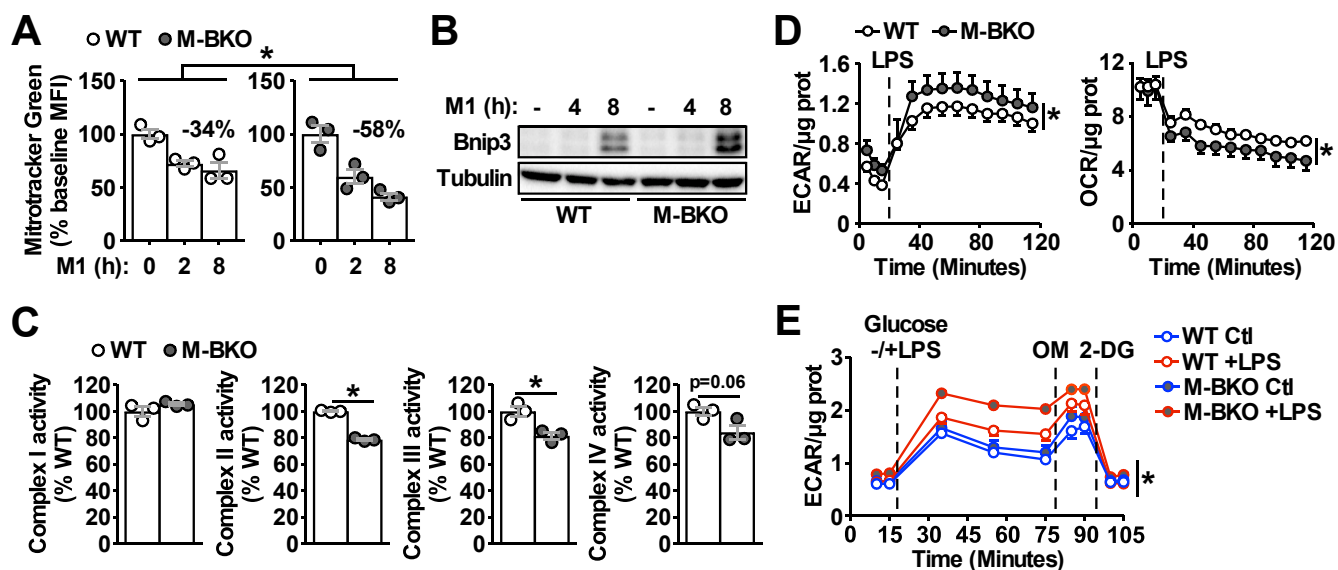

**Figure 2. Bmal1 is required to maintain mitochondrial metabolism.**

(A) Assessment of mitochondrial mass in macrophages throughout a time course of M1 activation using Mitotracker Green (mean fluorescence intensity, MFI) determined by flow cytometry. N=3 biological replicates, statistical analysis performed using 2-way ANOVA for WT vs. M-BKO across the time course. (B) Immunoblot of the mitophagy regulator Bnip3 in M1-activated WT and M-BKO BMDMs. (C) Activities of ETC complexes in isolated mitochondria from WT and M-BKO macrophages after 6 hours M1 stimulation. N=3 biological replicates, statistical analysis performed using Student's T test. (D) Extracellular flux analysis in *Ifn- $\gamma$* -primed macrophages measuring the changes in extracellular acidification rate (ECAR, left panel) and oxygen consumption rate (OCR, right panel) following LPS injection (100 ng/mL). Assay medium contained 5 mM glucose and 1 mM pyruvate in minimal DMEM with 2% dialyzed FBS, pH 7.4. N=5 biological replicates, statistical analysis performed using 2-way ANOVA for WT vs. M-BKO across the time course. (E) Glycolytic stress test in *Ifn- $\gamma$* -primed macrophages measuring ECAR following glucose (25 mM) injection, with or without LPS (100 ng/mL). Maximal glycolytic rate was determined by injection of oligomycin (OM, 2  $\mu$ M), and glycolysis-dependent ECAR was determined by injection with 2-deoxyglucose (2-DG, 50 mM). Assay medium contained minimal DMEM with 2% dialyzed FBS, pH 7.4. N=5 biological replicates, statistical analysis performed using 2-way ANOVA for WT vs. M-BKO across the time course. Data presented as mean  $\pm$  S.E.M. \*p<0.05. Experiments were repeated at least twice.

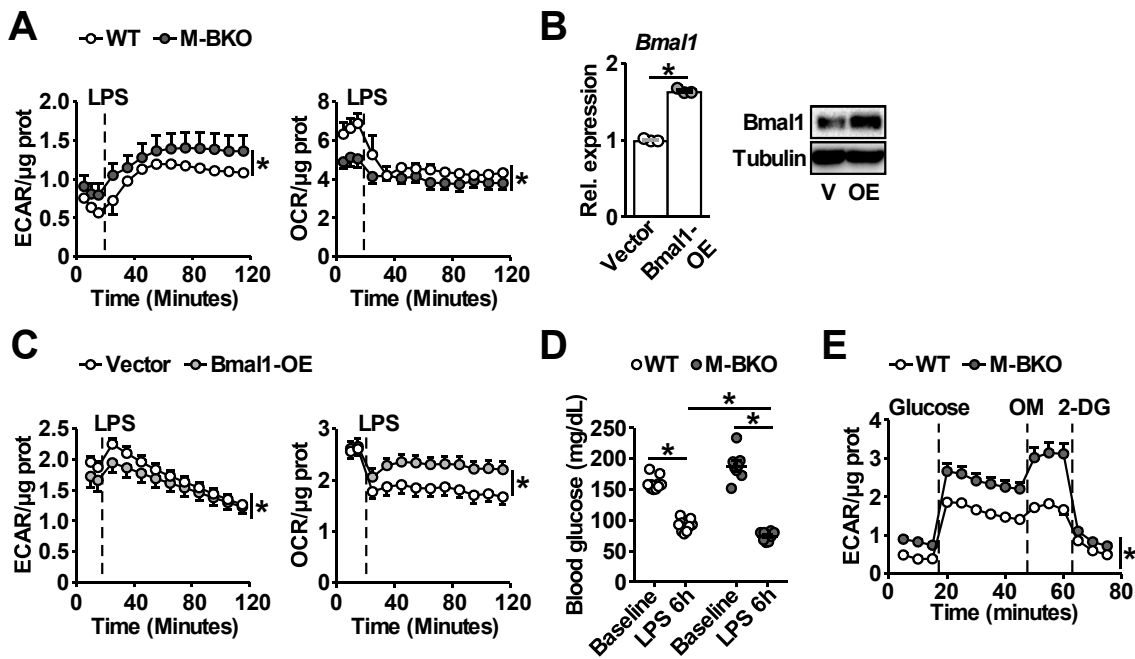

**Figure 2 supplemental figure 1. Effects of *Bmal1* gene deletion and over-expression on glycolytic versus oxidative metabolism.**

(A) Extracellular flux analysis of thioglycollate-elicited peritoneal macrophages measuring the changes in ECAR (left panel) and OCR (right panel) following LPS injection (final conc. 1  $\mu$ g/mL). Assay medium contained 5 mM glucose and 1 mM pyruvate in minimal DMEM with 2% dialyzed FBS, pH 7.4. N=5 biological replicates, statistical analysis performed using 2-way ANOVA for WT vs. M-BKO across the time course. (B) *Bmal1* mRNA expression determined by qPCR (left) and protein levels (right) in RAW264.7 macrophage stable lines. Bmal1 OE: Bmal1 over-expressing stable line. Cells transduced with empty vector were used as the control. N=3 biological replicates for qPCR, statistical analysis performed using Student's T test. V: vector control; OE: Bmal1 over-expression. (C) Measurement of the changes in ECAR (left) and OCR (right) in Ifn- $\gamma$ -primed RAW264.7 stable lines after injection with LPS (final conc. 100 ng/mL). Assay medium contained 25 mM glucose and 1 mM pyruvate in minimal DMEM with 2% dialyzed FBS, pH 7.4. N=5 biological replicates, statistical analysis performed using 2-way ANOVA for control vs. Bmal1 OE across the time course. (D) Blood glucose levels in 4-month-old WT and M-BKO male mice before and 6 h after i.p. injection with 10  $\mu$ g LPS per g body weight. N=10 mice, statistical analysis performed using Student's T test. (E) Glycolytic stress test in splenic macrophages isolated from mice in (D) that were sacrificed 6 h after LPS injection. ECAR was measured before and after injection with glucose (25 mM). Maximal glycolytic rate was determined by injection of oligomycin (OM, 2  $\mu$ M). Glycolysis-dependent ECAR was determined by injection with 2-deoxyglucose (2-DG, 50 mM). Assay medium contained minimal DMEM, pH 7.4. N=10 biological replicates, statistical analysis performed using 2-way ANOVA for WT vs. M-BKO across the time course. Data presented as mean  $\pm$  S.E.M. \*p<0.05. Experiments were repeated at least twice.



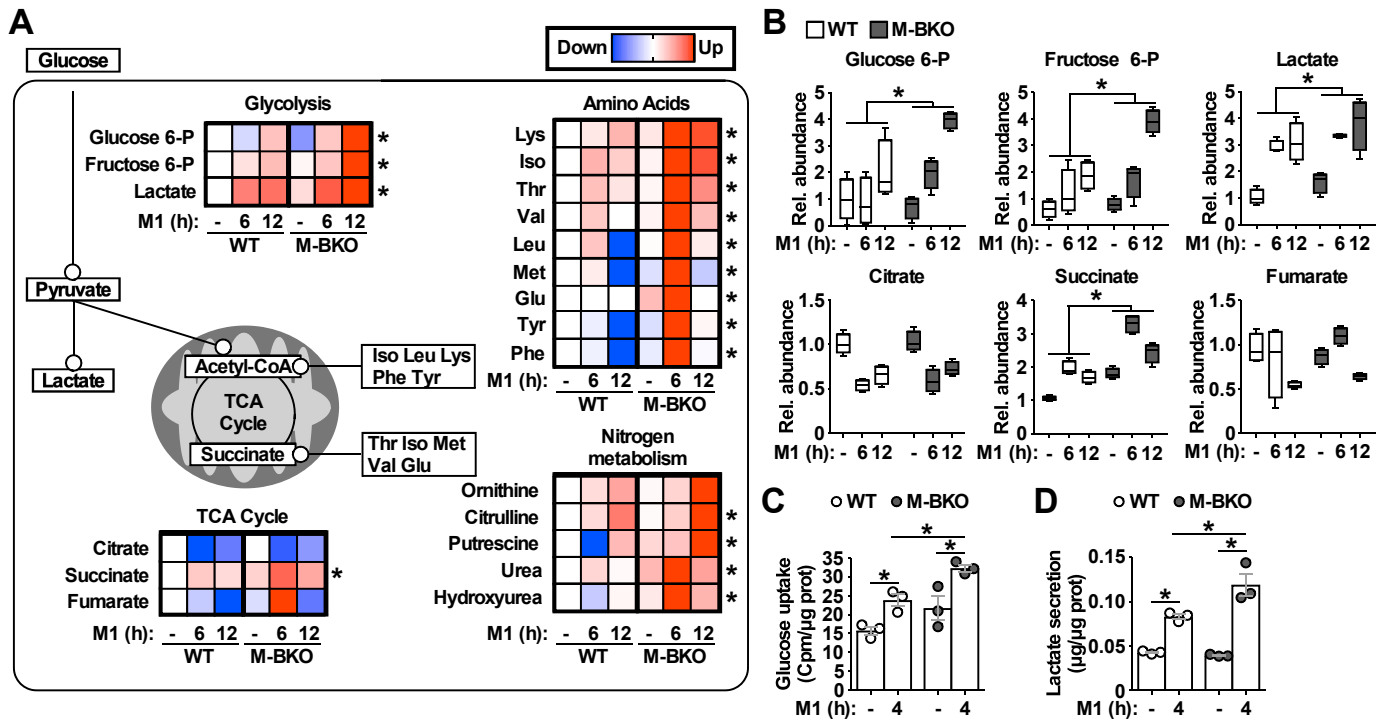

**Figure 3. *Bmal1* deletion induces a metabolic shift for glycolytic and amino acid metabolism.**

(A) Summary of steady-state metabolomics data for differentially regulated metabolites from WT and M-BKO macrophages throughout a 12-hour M1 activation time course. Data presented as heat maps (normalized to WT control for each metabolite, each panel is the average of 4 biological replicates). Statistical analysis performed using 2-way ANOVA for WT vs. M-BKO across the time course. (B) Box plots of relative abundances for select metabolites in (A). (C) and (D) Uptake of [ $^3$ H]-2-deoxyglucose and lactate secretion in control or M1-activated macrophages. N=3 biological replicates, statistical analysis performed using Student's T test. Cell culture assays were repeated at least twice.

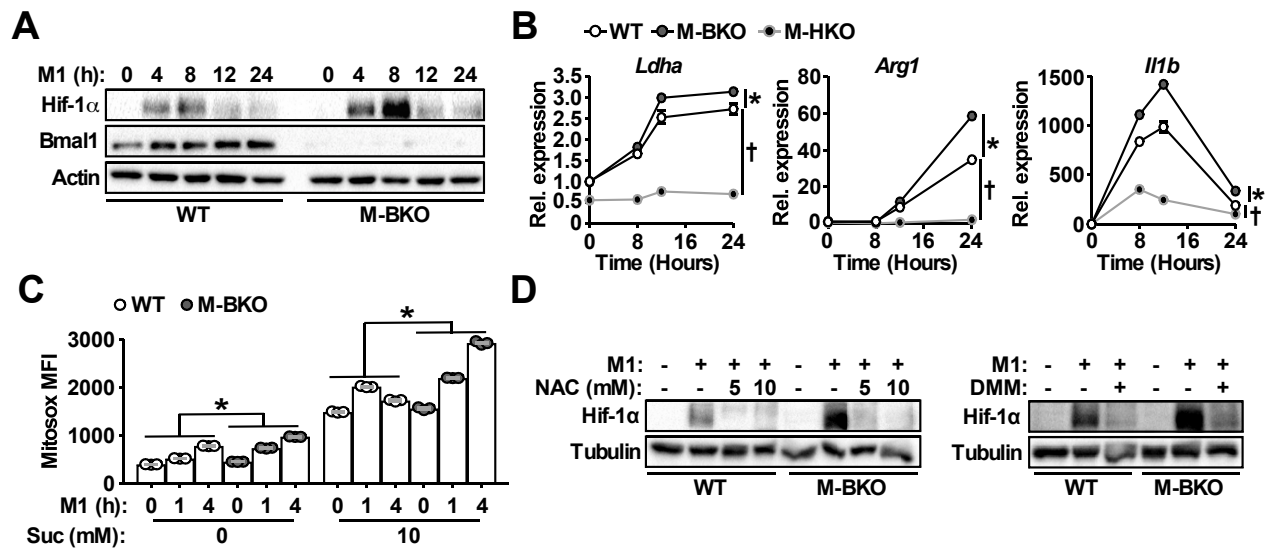

**Figure 4. *Bmal1* loss-of-function increases oxidative stress and Hif-1α protein accumulation.**

(A) Immunoblots of Hif-1α and Bmal1 protein levels in WT and M-BKO macrophages during a 24-hour time course of M1 activation. (B) Relative expression of Hif-1α target genes in WT, M-BKO and M-HKO macrophages determined by qPCR. N=3 biological replicates, statistical analysis performed using 2-way ANOVA for WT vs. M-BKO or WT vs. M-HKO across the time course. (C) Measurement of mROS using MitoSox Red (mean fluorescence intensity, MFI) in mitochondria isolated from control or M1-activated macrophages. Succinate (Suc, 10 mM) was included during MitoSox Red staining where indicated. N=3 biological replicates, statistical analysis was performed using 2-way ANOVA for WT vs. M-BKO across the time course. (D) Hif-1α protein levels in control or 8 hours M1-activated macrophages co-treated with or without N-acetylcysteine (NAC) or 10 mM dimethylmalonate (DMM). Data presented as mean ± S.E.M. \*p<0.05 for WT vs. M-BKO and †p<0.05 for WT vs. M-HKO. Experiments were repeated at least twice.

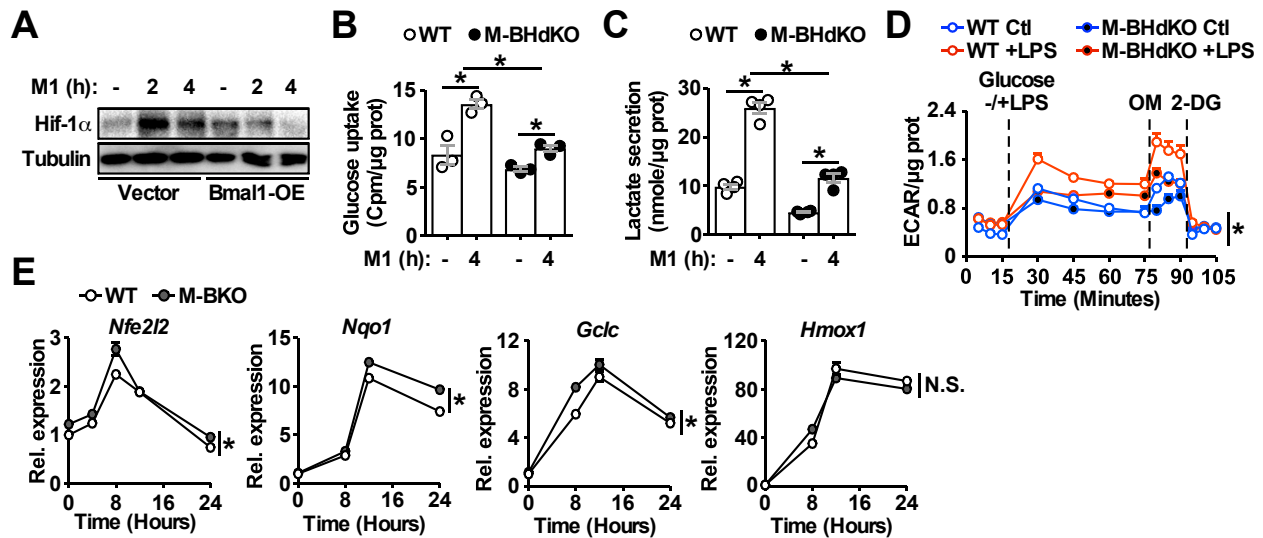

**Figure 4 supplemental figure 1. Increased oxidative stress and Hif-1 $\alpha$  activity in M1 activated M-BKO macrophages.**

(A) Hif-1 $\alpha$  protein levels in M1-activated (primed with 10 ng/mL Ifn- $\gamma$  and stimulated with 50 ng/mL LPS) control and Bmal1 OE RAW264.7 stable lines. (B) and (C) Uptake of [ $^3$ H]-2-deoxyglucose and lactate secretion in control or M1-activated macrophages. N=3 biological replicates, statistical analysis performed using Student's T test. M-BHdKO: myeloid-specific *Bmal1* and *Hif1a* double knockout. (D) Glycolytic stress test in Ifn- $\gamma$ -primed macrophages measuring ECAR following glucose (25 mM) injection without or with LPS (100 ng/mL). Maximal glycolytic rate was determined by injection of oligomycin (OM, 2  $\mu$ M), and glycolysis-dependent ECAR was determined by injection with 2-deoxyglucose (2-DG, 50 mM). Assay medium contained minimal DMEM with 2% dialyzed FBS, pH 7.4. N=5 biological replicates. The difference between LPS-treated WT and M-BHdKO macrophages was determined by 2-way ANOVA across the time course. (E) Expression of Nrf2 target genes determined by qPCR throughout a 24-hour time course following M1 stimulation. N=3 biological replicates, statistical analysis using 2-way ANOVA for WT vs. M-BKO across the time course. Data presented as mean  $\pm$  S.E.M. \*p<0.05. Experiments were repeated at least twice.

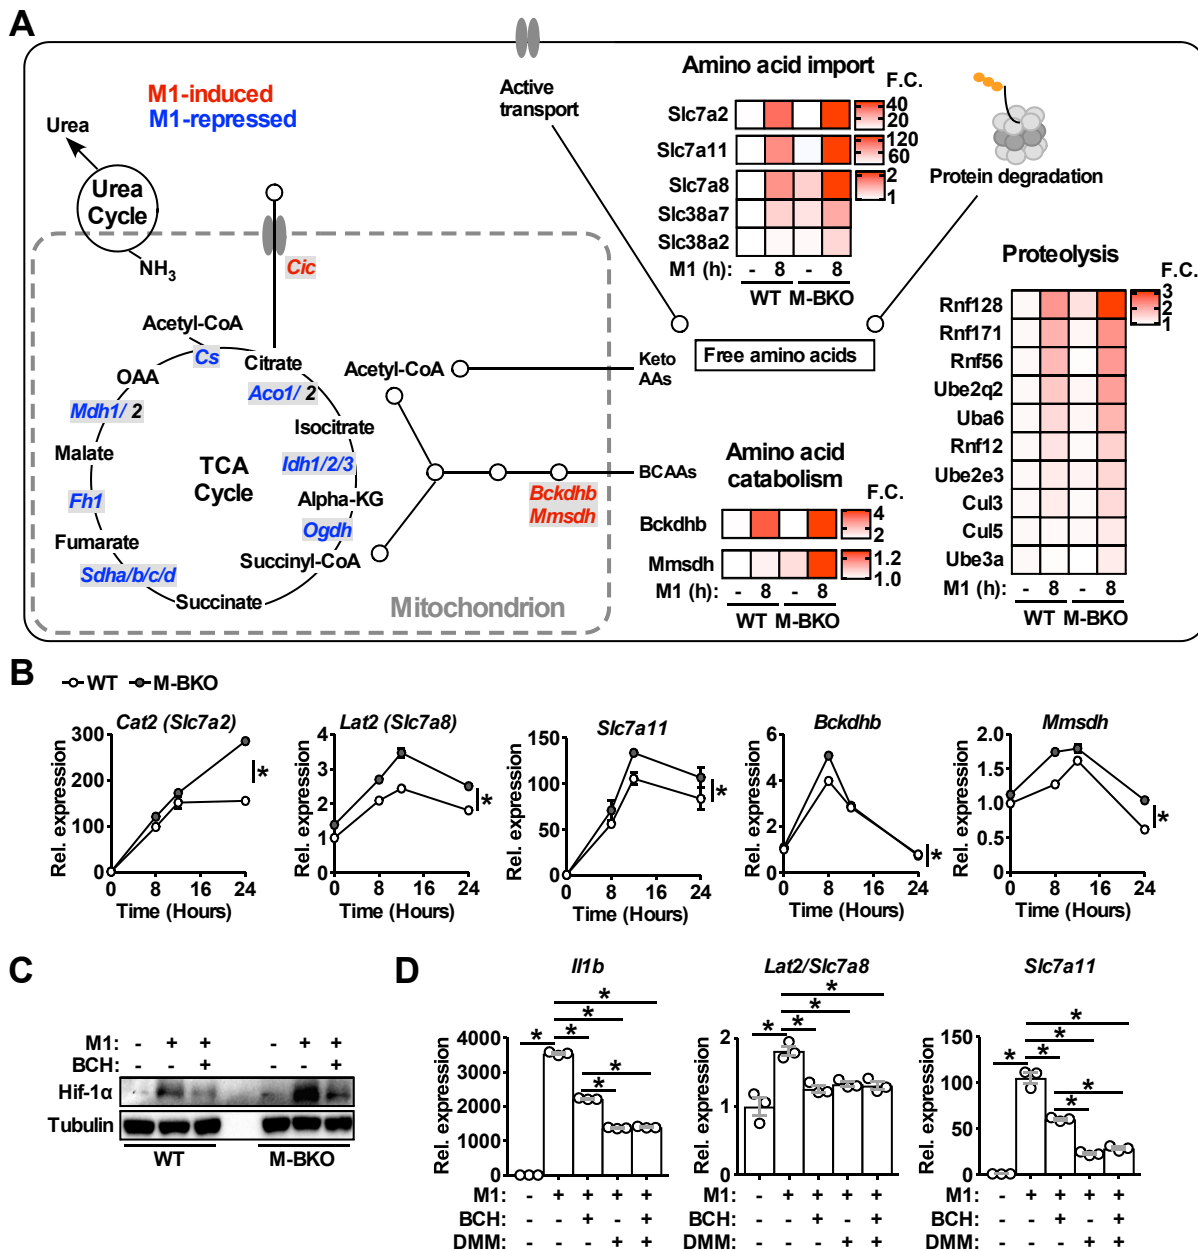

**Figure 5. Genes involved in amino acid uptake and catabolism are up-regulated in M-BKO macrophages.**

(A) Schematic representation of M1-regulated genes involved in amino acid and TCA metabolism determined by RNA-seq. Genes in blue are downregulated while genes in red are upregulated by 8 hours M1 activation in both WT and M-BKO macrophages. Genes differentially regulated between genotypes are displayed in heat maps on the right. F.C: fold change. N=3 biological replicates. BCAAs: branch chain amino acids; Keto AAs: ketogenic amino acids; Cic: mitochondrial citrate carrier. (B) Relative expression of differentially regulated genes identified by RNA-seq and validated by qPCR in a 24-hour time course of M1 activation. N=3 biological replicates, statistical analysis performed using 2-way ANOVA for WT vs. M-BKO across the time course. (C) Hif-1 $\alpha$  protein levels in control or 6 hours M1-activated macrophages with or without co-treatment of the neutral amino acid transport inhibitor 2-amino-2-norbornanecarboxylic acid (BCH, 10 mM). (D) Gene expression in control or 6 hours M1-activated macrophages with or without co-treatment of 10 mM BCH and/or the complex II inhibitor dimethyl malonate (DMM, 10 mM) determined by qPCR. N=3 biological replicates, statistical analysis performed using Student's T test. Data presented as mean  $\pm$  S.E.M. \*p<0.05. Cell culture experiments were repeated at least twice.

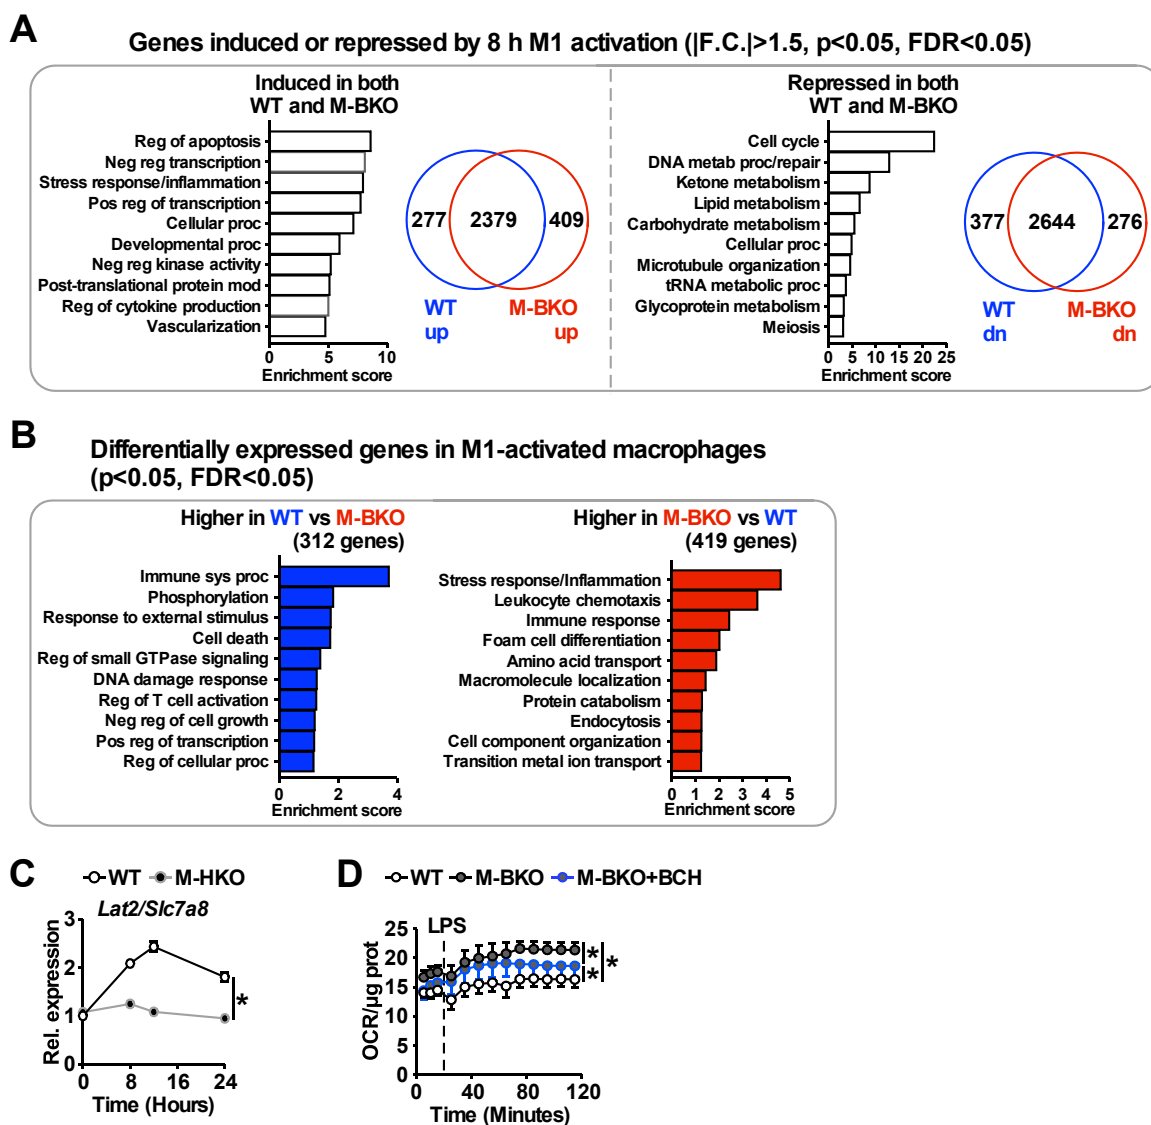

**Figure 5 supplemental figure 1. Transcriptome analysis of genes regulated by M1 stimulation in WT and M-BKO macrophages.**

(A) Functional annotation clustering by biological process and venn diagram of genes identified by RNA-seq that are mutually induced (2,379 genes, left) or suppressed (2,644 genes, right) by 8 h M1 activation in WT and M-BKO macrophages.  $N=3$  biological replicates. F.C.: fold change. (B) Enriched biological processes in direct comparison of differentially expressed genes between M1-activated WT and M-BKO macrophages. (C) Relative expression of the neutral amino acid transporter *Slc7a8* (*Lat2*) in WT and myeloid *Hif1a* knockout (M-HKO) macrophages determined by qPCR. WT samples were from Figure 5B.  $N=3$  biological replicates, statistical analysis performed using 2-way ANOVA for WT vs. M-HKO across the time course. (D) Determination of glutamine utilization by extracellular flux analysis. OCR was measured before and after LPS injection (final conc. 1  $\mu\text{g}/\text{mL}$ ), and assay medium contained 5 mM glutamine in minimal DMEM with 2% dialyzed FBS, pH 7.4.  $N=5$  biological replicates, statistical analysis performed using 2-way ANOVA for WT vs. M-BKO and WT or M-BKO vs M-BKO cells co-treated with the neutral amino acid transport inhibitor 2-amino-2-norbornanecarboxylic acid (BCH, 10 mM) across the time course. Data presented as mean  $\pm$  S.E.M. \* $p < 0.05$ . Experiments were repeated at least twice.

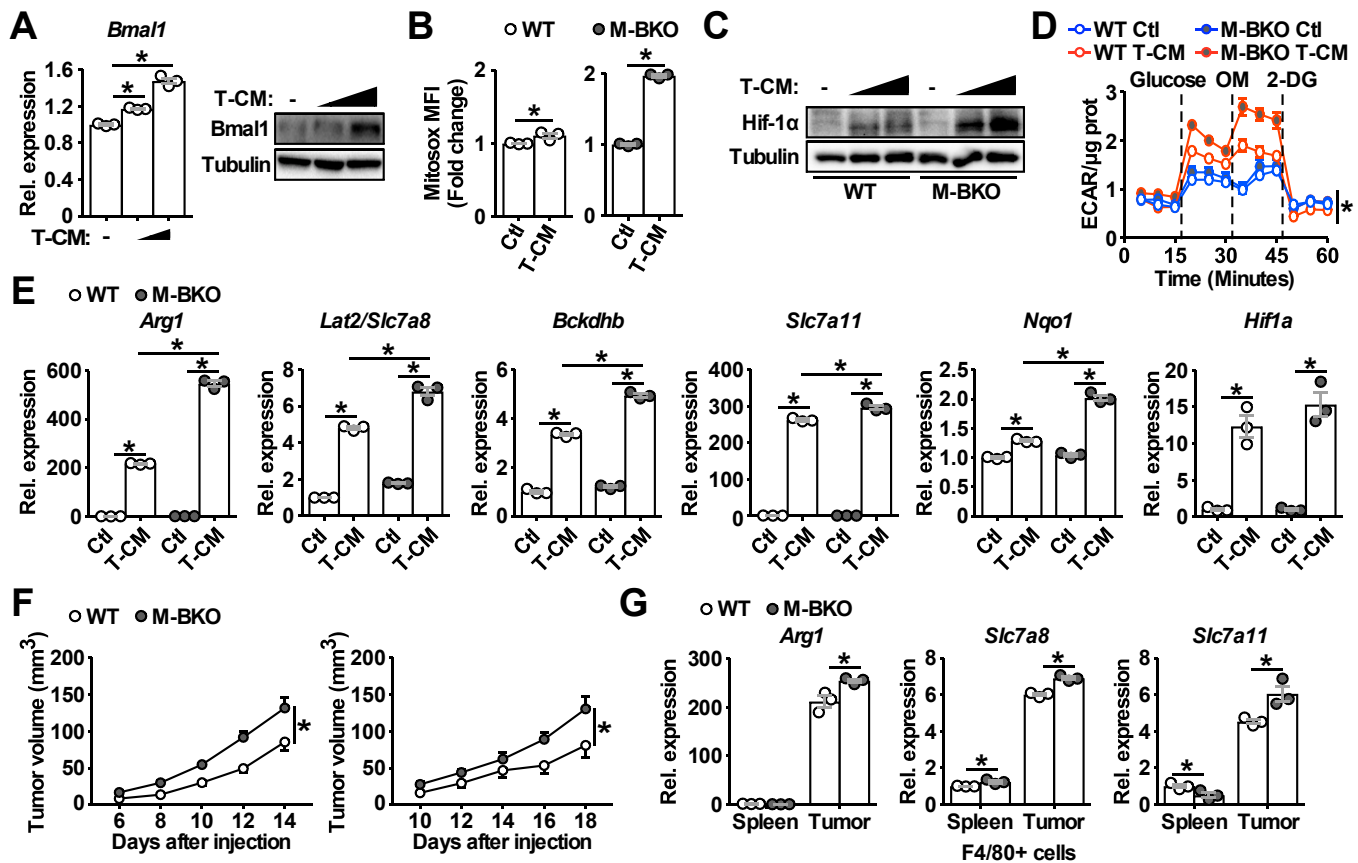

**Figure 6. *Bmal1* regulates tumor-associated macrophage polarization.**

(A) *Bmal1* gene expression (left panel) and protein levels (right panel) in WT macrophages treated with control medium or increasing doses of B16-F10 tumor-conditioned medium (T-CM, diluted 1:3 or 1:1 with control medium) for 8 hours. N=3 biological replicates for qPCR, statistical analysis performed using Student's T test. (B) Measurement of mROS using MitoSox Red (mean fluorescent intensity, MFI) in mitochondria from macrophages treated with control medium or T-CM diluted 1:1 with control medium for 1 hour. N=3 biological replicates, statistical analysis performed using Student's T test. (C) Hif-1 $\alpha$  protein levels in WT and M-BKO macrophages treated with control medium, T-CM diluted 1:1 with control medium, or undiluted T-CM for 4 hours. (D) Glycolytic stress test in macrophages pretreated with control medium or T-CM diluted 1:1 with control medium for 4 hours. N=5 biological replicates. Statistical analysis performed using 2-way ANOVA comparing T-CM-treated M-BKO vs. WT cells across the time course. (E) Relative expression of genes involved in amino acid metabolism and oxidative stress response in macrophages treated with control medium or T-CM diluted 1:3 with control medium for 8 hours determined by qPCR. N=3 biological replicates, statistical analysis performed using Student's T test. (F) Tumor volume in male (left) and female (right) WT and M-BKO mice. 300,000 B16-F10 cells were injected subcutaneously in the right flank. N= 18 (male) and 8 (female) mice, statistical analysis performed using 2-way ANOVA for WT vs. M-BKO mice across the time course. (G) Gene expression for F4/80<sup>+</sup> cells isolated from B16-F10 tumors or spleens of female mice 14 days after injection. Tissues from 6 mice per genotype were pooled into 3 groups for leukocyte isolation. Statistical analysis performed using Student's T test. Data presented as mean  $\pm$  S.E.M. \*p<0.05. Experiments were repeated at least twice.

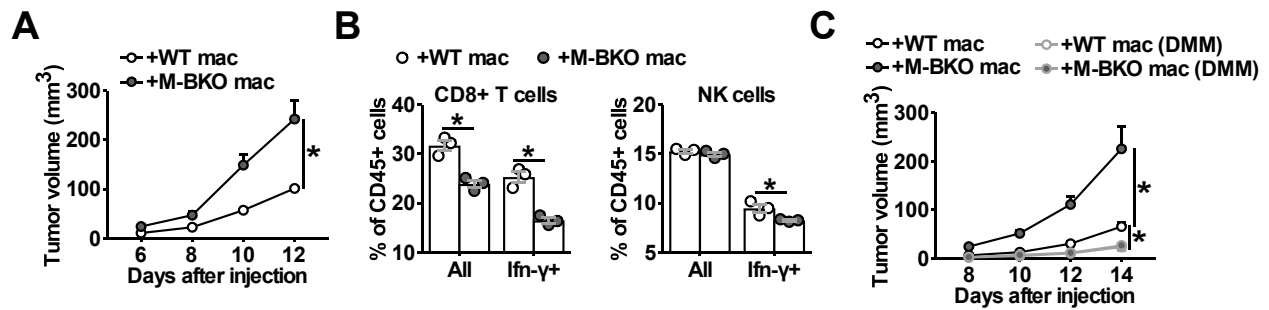

**Figure 7. Macrophage Bmal1 modulates the antitumor activity.**

(A) Tumor volume in WT male mice co-injected with 500,000 B16-F10 cells and either 500,000 WT or M-BKO macrophages as indicated. N=22 mice, statistical analysis performed using 2-way ANOVA for WT vs. M-BKO macrophage co-injection across the time course. (B) Flow cytometric analysis of tumor-infiltrating CD8<sup>+</sup> T cells (CD45<sup>+</sup>CD3<sup>+</sup>CD8a<sup>+</sup> cells, left panel) and NK cells (CD45<sup>+</sup>CD3<sup>-</sup>NK1.1<sup>+</sup> cells, right panel) stimulated *ex vivo* with phorbol 12-myristate 13-acetate and ionomycin for Ifn- $\gamma$  co-staining. Tumors from (A) were pooled into three groups prior to isolation of infiltrating leukocytes for flow cytometry. Statistical analysis performed using Student's T test. (C) Tumor volume in WT male mice co-injected with 500,000 B16-F10 cells and either 500,000 WT or M-BKO macrophages supplemented without or with dimethylmalonate (DMM, approximately 150 mg/kg body weight per day in mouse diet). N=8 mice, statistical analysis performed using 2-way ANOVA for WT vs. M-BKO macrophage co-injection on control diet or for WT macrophage co-injection on the control diet vs. WT or M-BKO macrophage co-injection on the DMM-supplemented diet across the time course. Data presented as mean  $\pm$  S.E.M. \*p<0.05. Experiments were repeated at least twice.

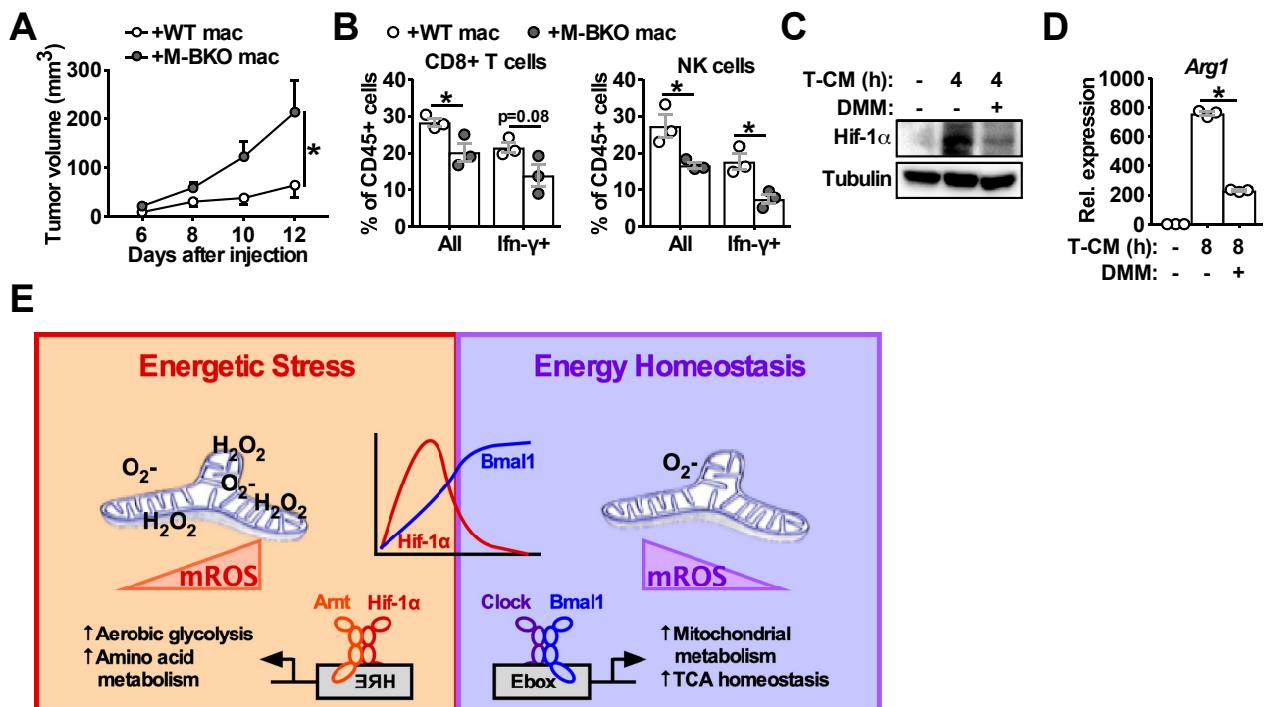

**Figure 7 supplemental figure 1. Macrophage Bmal1 regulates tumor growth in a cell-autonomous manner.**

(A) Tumor volume in M-BKO male mice co-injected with 500,000 B16-F10 cells and either 500,000 WT or M-BKO macrophages as indicated. N=6 mice, statistical analysis performed using 2-way ANOVA for WT vs. M-BKO macrophage co-injection across the time course. (B) Flow cytometric analyses of tumor-infiltrating CD8<sup>+</sup> T cells (CD45<sup>+</sup>CD3<sup>+</sup>CD8a<sup>+</sup> cells, left panel) and NK cells (CD45<sup>+</sup>CD3<sup>+</sup>NK1.1<sup>+</sup> cells, right panel) stimulated *ex vivo* with phorbol 12-myristate 13-acetate and ionomycin for Ifn-γ co-staining. Tumors from (A) were pooled into three groups prior to isolation of infiltrating leukocytes for flow cytometric analyses. Statistical analysis performed using Student's T test. Data presented as mean ± S.E.M. \*p<0.05. (C) Hif-1α protein levels in WT macrophages treated with (from left to right) control medium or B16-F10 tumor-conditioned medium (T-CM) diluted 1:1 with control medium without or with co-treatment with 10 mM dimethyl malonate (DMM) for 4 hours. (D) *Arg1* gene expression in WT macrophages treated as in (C) for 8 hours. N=3 biological replicates. Statistical analysis performed using Student's T test. Experiments were repeated at least twice. (E) Schematic showing the working model for Bmal1-Hif-1α crosstalk in the regulation of macrophage bioenergetics and effector functions. Both M1 and tumor-associated macrophages share similar energetically stressed states. Bmal1 preserves mitochondrial oxidative metabolism while reducing oxidative stress to modulate Hif-1α activity and support proper effector functions. Deletion of *Bmal1* in the macrophage leads to reliance on glycolytic metabolism and alternative fuel utilization, notably amino acid metabolism, which further promotes mROS production and Hif-1α protein stabilization. Increased amino acid utilization by M-BKO macrophages may lead to depletion of amino acids critical for lymphocyte activation and cytotoxic function, thereby suppressing anti-tumor immunity in the tumor microenvironment.
